# Supplementary material
Source: PubMed Central journal article supplement (PMC4200000)
Supplement: tableS1.pdf [file tableS1.pdf]

**Supplemental Table 1. 542 Gene Changed between ABCG2 MSC and NG2 pericytes**

| ABCG2/NG2   | ABCG2/Fibroblast | Accession           | Gene Symbol    | Gene Description                                                                              |
|-------------|------------------|---------------------|----------------|-----------------------------------------------------------------------------------------------|
| 3.60493818  | 37.1298869       | NM_001099327        | 100043387      | predicted gene, 100043387                                                                     |
| -2.46115063 | -65.2856118      | NM_183116           | 1110021L09Rik  | RIKEN cDNA 1110021L09 gene                                                                    |
| -2.09570207 | 11.4613658       | CT010205            | 1110032A03Rik  | RIKEN cDNA 1110032A03 gene                                                                    |
| -2.84877383 | 4.40602958       | NM_027878           | 1200002N14Rik  | RIKEN cDNA 1200002N14 gene                                                                    |
| -2.97417537 | -17.0971585      | NM_024244           | 1200015N20Rik  | RIKEN cDNA 1200015N20 gene                                                                    |
| -5.90317407 | 29.4188088       | ENSJMUST00000021207 | 1500005K14Rik  | RIKEN cDNA 1500005K14 gene                                                                    |
| 2.4046798   | 64.7481695       | NM_026889           | 1500010J02Rik  | RIKEN cDNA 1500010J02 gene                                                                    |
| 2.39633407  | 135.382956       | BC034723            | 1700025G04Rik  | RIKEN cDNA 1700025G04 gene                                                                    |
| -2.9669558  | 9.39947946       | NM_027285           | 1700029I01Rik  | RIKEN cDNA 1700029I01 gene                                                                    |
| 2.45140774  | 109.433902       | BC048158            | 1700047117Rik1 | RIKEN cDNA 1700047117 gene 1                                                                  |
| 2.15903511  | -2.92552387      | NM_134133           | 2010002N04Rik  | RIKEN cDNA 2010002N04 gene                                                                    |
| -2.65924411 | -3.83911539      | NM_001081156        | 2300002D11Rik  | RIKEN cDNA 2300002D11 gene                                                                    |
| -2.61435016 | 12.8287151       | AY761096            | 2310044H10Rik  | RIKEN cDNA 2310044H10 gene                                                                    |
| 2.16941165  | -1.88772723      | ENSJMUST00000053264 | 2410089E03Rik  | RIKEN cDNA 2410089E03 gene                                                                    |
| 2.23426034  | 36.6621636       | U62393              | 3100002L24Rik  | RIKEN cDNA 3100002L24 gene                                                                    |
| 7.79280122  | -2.87960937      | NM_178098           | 4930486L24Rik  | RIKEN cDNA 4930486L24 gene                                                                    |
| -2.62140625 | -2.64074793      | ENSJMUST00000060298 | 4930523C07Rik  | RIKEN cDNA 4930523C07 gene                                                                    |
| -2.4357309  | 8.43634779       | BC060233            | 4931406P16Rik  | RIKEN cDNA 4931406P16 gene                                                                    |
| -5.03188831 | -1.6527143       | AK030236            | 4933427G23Rik  | RIKEN cDNA 4933427G23 gene                                                                    |
| -15.0199493 | -41.3532721      | NM_001126490        | 5430433G21Rik  | RIKEN cDNA 5430433G21 gene                                                                    |
| 2.16200096  | -2.32247677      | BC060679            | 6030443O07Rik  | RIKEN cDNA 6030443O07 gene                                                                    |
| -4.52061618 | 4.41099534       | BC116246            | 6330406I15Rik  | RIKEN cDNA 6330406I15 gene                                                                    |
| 4.19574229  | -2.73258619      | NM_029679           | 6330500D04Rik  | RIKEN cDNA 6330500D04 gene                                                                    |
| 4.95185254  | 4.07058979       | NM_029528           | 6330503C03Rik  | RIKEN cDNA 6330503C03 gene                                                                    |
| 4.55576986  | 14.3637966       | BC057309            | 6430706D22Rik  | RIKEN cDNA 6430706D22 gene                                                                    |
| -2.25714253 | 16.7287066       | NM_172600           | 6720456H20Rik  | RIKEN cDNA 6720456H20 gene                                                                    |
| -3.61535293 | 4.27888123       | NM_133733           | 9030425E11Rik  | RIKEN cDNA 9030425E11 gene                                                                    |
| 4.22050123  | 1.79379199       | BC066161            | 9030617003Rik  | RIKEN cDNA 9030617003 gene                                                                    |
| 3.53560957  | -3.07475163      | BC116748            | 9030625A04Rik  | RIKEN cDNA 9030625A04 gene                                                                    |
| 3.36613891  | -42.1354542      | BC006604            | 9130213B05Rik  | RIKEN cDNA 9130213B05 gene                                                                    |
| 4.37217759  | -4.45214908      | BC147606            | 9430028L06Rik  | RIKEN cDNA 9430028L06 gene                                                                    |
| 2.80142024  | 1.46132732       | NM_153416           | Aaas           | achalasia, adrenocortical insufficiency, alacrimia                                            |
| -173.021884 | -1.6061943       | NM_001014423        | Abi3bp         | ABI gene family, member 3 (NESH) binding protein                                              |
| -2.97727862 | -2.31524423      | NM_009606           | Acta1          | actin, alpha 1, skeletal muscle                                                               |
| 2.27747743  | -63.7124686      | NM_019673           | Actl6a         | actin-like 6A                                                                                 |
| -3.14805703 | -5.69699303      | NM_011780           | Adam23         | a disintegrin and metallopeptidase domain 23                                                  |
| -6.48458452 | -492.940865      | NM_153534           | Adcy2          | adenylate cyclase 2                                                                           |
| 2.32521864  | 1.86977801       | NM_134052           | Adi1           | acireductone dioxygenase 1                                                                    |
| 2.25581241  | -2.25923721      | NM_026644           | Agpat4         | 1-acylglycerol-3-phosphate O-acyltransferase 4 (lysophosphatidic acid acyltransferase, delta) |
| -2.38096952 | -147.28887       | NM_009642           | Agtrap         | angiotensin II, type I receptor-associated protein                                            |
| -2.99753789 | 1.57162418       | NM_001081277        | Ak5            | adenylate kinase 5                                                                            |
| 8.74238506  | 27.3201342       | NM_031185           | Akap12         | A kinase (PRKA) anchor protein (gravin) 12                                                    |
| -2.12721812 | -55.9727711      | NM_001007589        | Akirin2        | akirin 2                                                                                      |
| -3.03934852 | 4.17219761       | NM_009667           | Ampd3          | adenosine monophosphate deaminase 3                                                           |
| 6.21159595  | 13.9782672       | NM_007449           | Ang2           | angiogenin, ribonuclease A family, member 2                                                   |
| 3.90617275  | -4.03412856      | NM_013468           | Ankrd1         | ankyrin repeat domain 1 (cardiac muscle)                                                      |
| -3.54722515 | 4.60966534       | NM_013473           | Anxa8          | annexin A8                                                                                    |
| 2.34552205  | 10.9726181       | NM_026887           | Ap1s2          | adaptor-related protein complex 1, sigma 2 subunit                                            |
| 2.38483296  | 47.7862453       | NM_009698           | Aprt           | adenine phosphoribosyl transferase                                                            |
| 2.85642617  | 26.3806074       | NM_030113           | Arhgap10       | Rho GTPase activating protein 10                                                              |
| -2.89557514 | 5.31528353       | NM_172525           | Arhgap29       | Rho GTPase activating protein 29                                                              |
| -11.2844953 | 3.43790402       | NM_007486           | Arhgdib        | Rho, GDP dissociation inhibitor (GDI) beta                                                    |
| -16.9708389 | -5.52517156      | NM_025711           | Aspn           | asporin                                                                                       |
| -2.57030423 | 5.58087887       | NM_030693           | Atf5           | activating transcription factor 5                                                             |
| 2.34985535  | 13.3202102       | NM_153778           | Atoh8          | atonal homolog 8 (Drosophila)                                                                 |
| -5.88144147 | 3.23776219       | NM_009728           | Atp10a         | ATPase, class V, type 10A                                                                     |
| 3.63321159  | 38.6557555       | NM_009721           | Atp1b1         | ATPase, Na <sup>+</sup> /K <sup>+</sup> transporting, beta 1 polypeptide                      |
| -5.0995487  | -9.46105066      | NM_213616           | Atp2b4         | ATPase, Ca <sup>++</sup> transporting, plasma membrane 4                                      |
| -2.4631312  | 6.30783193       | NM_033617           | Atp6v0b        | ATPase, H <sup>+</sup> transporting, lysosomal V0 subunit B                                   |
| -5.60596011 | -7.21254291      | NM_001001488        | Atp8b1         | ATPase, class I, type 8B, member 1                                                            |
| 4.45261613  | -2.39469803      | NM_134096           | AW049604       | expressed sequence AW049604                                                                   |
| 2.38748782  | 9.84985211       | BC024059            | AW061290       | expressed sequence AW061290                                                                   |
| 2.53273889  | 12.9840799       | NM_001102458        | Azin1          | antizyme inhibitor 1                                                                          |
| -4.74695003 | -1.9914105       | NM_020026           | B3galnt1       | UDP-GalNAc:betaGlcNAc beta 1,3-galactosaminyltransferase, polypeptide 1                       |
| -2.26208677 | 6.18755773       | NM_001081204        | B3galnt2       | beta 1,3-galactosyltransferase-like                                                           |
| -14.4530731 | -21.0090067      | NM_007526           | Barx1          | BarH-like homeobox 1                                                                          |
| -2.41731096 | 2.90134972       | BC057379            | BC030046       | cDNA sequence BC030046                                                                        |
| 2.38032439  | 83.1475777       | BC089623            | BC056474       | cDNA sequence BC056474                                                                        |
| -8.3245598  | -1.93738465      | NM_007554           | Bmp4           | bone morphogenetic protein 4                                                                  |
| -2.78019961 | -6.45457727      | NM_172506           | Boc            | biregional cell adhesion molecule-related/down-regulated by oncogenes (Cdon) binding protein  |
| -2.49376645 | 2.2618306        | NM_018819           | Brp44l         | brain protein 44-like                                                                         |
| -2.26151308 | -9.00659541      | NM_007570           | Btg2           | B-cell translocation gene 2, anti-proliferative                                               |
| 2.32403767  | 29.9923607       | NM_001113179        | Bub1           | budding uninhibited by benzimidazoles 1 homolog (S. cerevisiae)                               |
| -15.1359497 | -4.81244892      | NM_030888           | C1qtnf3        | C1q and tumor necrosis factor related protein 3                                               |
| -2.80319646 | -15.2560903      | NM_001113356        | C1rb           | complement component C1rb                                                                     |
| 18.2019775  | 11.4530942       | NM_009779           | C3ar1          | complement component 3a receptor 1                                                            |
| -4.00657454 | 1.34791293       | NM_133189           | Cacng7         | calcium channel, voltage-dependent, gamma subunit 7                                           |
| 7.82765674  | -1.2729263       | NM_018782           | Calcri         | calcitonin receptor-like                                                                      |
| -17.0148739 | -3.43958347      | NM_007621           | Cbr2           | carbonyl reductase 2                                                                          |
| -2.22641456 | 39.2435129       | NM_026439           | Ccdc80         | coiled-coil domain containing 80                                                              |
| 3.38546023  | -73.5562376      | NM_011333           | Ccl2           | chemokine (C-C motif) ligand 2                                                                |
| 4.98219877  | -1.02519222      | NM_013654           | Ccl7           | chemokine (C-C motif) ligand 7                                                                |
| 2.93193052  | 74.9070109       | NM_153098           | Cd109          | CD109 antigen                                                                                 |
| 4.3355385   | 55.5088024       | NM_009846           | Cd24a          | CD24a antigen                                                                                 |
| -6.29346261 | -12.6541617      | NM_001111059        | Cd34           | CD34 antigen                                                                                  |
| -13.1680604 | -559.344992      | NM_010016           | Cd55           | CD55 antigen                                                                                  |
| -6.88449262 | 10.9763616       | NM_001111060        | Cd59a          | CD59a antigen                                                                                 |
| -4.89555535 | -2.45899277      | BC131959            | Cd80           | CD80 antigen                                                                                  |
| -7.05514675 | -1.47052923      | NM_009855           | Cd80           | CD80 antigen                                                                                  |
| -2.37622229 | 5.53649348       | NM_021454           | Cdc42ep5       | CDC42 effector protein (Rho GTPase binding) 5                                                 |
| 3.98628934  | 98.9348625       | NM_007664           | Cdh2           | cadherin 2                                                                                    |
| -2.39952608 | 4.22868837       | BC049694            | Cdkn3          | cyclin-dependent kinase inhibitor 3                                                           |
| -2.05447863 | -3.66260009      | NM_021339           | Cdon           | cell adhesion molecule-related/down-regulated by oncogenes                                    |

|             |             |                     |                    |                                                                                 |
|-------------|-------------|---------------------|--------------------|---------------------------------------------------------------------------------|
| 2.73245085  | 11.4523951  | NM_026014           | Cdt1               | chromatin licensing and DNA replication factor 1                                |
| -2.24353164 | -4.04127596 | AF320340            | Cdv3               | carnitine deficiency-associated gene expressed in ventricle 3                   |
| -2.62520141 | 7.26221678  | NM_009888           | Cfh                | complement component factor h                                                   |
| -2.17474796 | 5.24133576  | NM_026599           | Cgln1              | cingulin-like 1                                                                 |
| -2.50306575 | -64.510725  | NM_026929           | Chac1              | ChaC, cation transport regulator-like 1 (E. coli)                               |
| -2.28411526 | -3.82246635 | ENSMUST00000029049  | Chmp4c             | chromatin modifying protein 4C                                                  |
| -2.1755127  | 12.0330178  | NM_001001565        | Chpf               | chondroitin polymerizing factor                                                 |
| -2.70580596 | 3.29001776  | NM_001114347        | Clasp2             | CLIP associating protein 2                                                      |
| 2.80043457  | 12.1121484  | NM_019952           | Clcf1              | cardiotrophin-like cytokine factor 1                                            |
| -20.1147487 | -8.47516865 | NM_009131           | Clec11a            | C-type lectin domain family 11, member a                                        |
| -2.6957087  | 10.8364858  | NM_001081114        | Clip3              | CAP-GLY domain containing linker protein 3                                      |
| -10.083212  | 5.10688604  | NM_008153           | Cmklr1             | chemokine-like receptor 1                                                       |
| -3.09174814 | -25.8415993 | NM_009922           | Cnn1               | calponin 1                                                                      |
| 3.86497608  | 1.28115315  | NM_172496           | Cobl               | cordon-bleu                                                                     |
| 3.505152    | -16.4921031 | NM_177025           | Cobl1              | Cobl-like 1                                                                     |
| -6.3714491  | -369.852215 | NM_009925           | Col10a1            | collagen, type X, alpha 1                                                       |
| -2.94219858 | 2.25469115  | NM_007729           | Col11a1            | collagen, type XI, alpha 1                                                      |
| -10.1405889 | -8.743016   | NM_181277           | Col14a1            | collagen, type XIV, alpha 1                                                     |
| -2.17878044 | -30.1268629 | NM_009930           | Col3a1             | collagen, type III, alpha 1                                                     |
| -2.69845488 | -5.01021075 | NM_007737           | Col5a2             | collagen, type V, alpha 2                                                       |
| 2.10726028  | 24.2961518  | NM_009933           | Col6a1             | collagen, type VI, alpha 1                                                      |
| 2.98297752  | 33.0796455  | NM_146007           | Col6a2             | collagen, type VI, alpha 2                                                      |
| -13.5270543 | -2.3823492  | NM_130449           | Colec12            | collectin sub-family member 12                                                  |
| -124.609858 | -3.96518739 | NM_018867           | Cpxm2              | carboxypeptidase X 2 (M14 family)                                               |
| 2.25541086  | 10.9179846  | NM_028798           | Crct1              | cysteine-rich C-terminal 1                                                      |
| -2.52007829 | 10.699175   | NM_139001           | Cspg4              | chondroitin sulfate proteoglycan 4                                              |
| -4.35716018 | -30.3052611 | NM_026778           | Cthrc1             | collagen triple helix repeat containing 1                                       |
| 3.52797951  | -1.48945117 | NM_007796           | Ctla2a             | cytotoxic T lymphocyte-associated protein 2 alpha                               |
| -5.1752287  | 2.55347075  | NM_009982           | Ctsc               | cathepsin C                                                                     |
| -2.82758778 | 5.50064224  | NM_007802           | Ctsk               | cathepsin K                                                                     |
| 2.49154289  | 1.04003008  | NM_001110231        | Cugbp2             | CUG triplet repeat, RNA binding protein 2                                       |
| -2.29431684 | -3.78018745 | NM_009142           | Cx3cl1             | chemokine (C-X3-C motif) ligand 1                                               |
| 2.14512834  | -9.69970346 | NM_001012477        | Cxcl12             | chemokine (C-X-C motif) ligand 12                                               |
| 2.26192054  | 70.0679504  | NM_009994           | Cyp11b             | cytochrome P450, family 1, subfamily b, polypeptide 1                           |
| -3.03156031 | -19.332223  | NM_011182           | Cyth3              | cytohesin 3                                                                     |
| -5.53826417 | -2.44821454 | BC128276            | D12Ert647e         | DNA segment, Chr 12, ERATO Doi 647, expressed                                   |
| -10.999976  | -2.18189838 | NM_007833           | Dcn                | decorin                                                                         |
| 3.28719976  | 37.7201864  | NM_178788           | Dctd               | dCMP deaminase                                                                  |
| 4.3075374   | -2.76293585 | NM_012008           | Ddx3y              | DEAD (Asp-Glu-Ala-Asp) box polypeptide 3, Y-linked                              |
| -2.55900217 | -9.18816164 | NM_172689           | Ddx58              | DEAD (Asp-Glu-Ala-Asp) box polypeptide 58                                       |
| -7.32996566 | -579.420057 | NM_010043           | Des                | desmin                                                                          |
| -3.17511517 | 13.0455271  | NM_053272           | Dhcr24             | 24-dehydrocholesterol reductase                                                 |
| -14.2280696 | 1.11854392  | NM_011303           | Dhrs3              | dehydrogenase/reductase (SDR family) member 3                                   |
| -2.45093806 | -54.0693443 | NM_030686           | Dhrs4              | dehydrogenase/reductase (SDR family) member 4                                   |
| -11.3533634 | 1.3282091   | NM_175512           | Dhrs9              | dehydrogenase/reductase (SDR family) member 9                                   |
| -81.9795542 | -2.29841052 | NM_172119           | Dio3               | diiodinase, iodothyronine type III                                              |
| -17.173492  | -4.54225575 | NM_015814           | Dkk3               | dickkopf homolog 3 (Xenopus laevis)                                             |
| -3.50251265 | 9.00975209  | NM_032418           | Dmpk               | dystrophia myotonica-protein kinase                                             |
| -2.28640375 | -7.45456694 | NM_028207           | Dusp3              | dual specificity phosphatase 3 (vaccinia virus phosphatase VH1-related)         |
| 6.70858192  | 48.5150477  | NM_176933           | Dusp4              | dual specificity phosphatase 4                                                  |
| -2.5169833  | 1.65470323  | NM_007897           | Ebf1               | early B-cell factor 1                                                           |
| -3.31001432 | 2.2733644   | NM_199307           | Ece1               | endothelin converting enzyme 1                                                  |
| 2.12545639  | 5.6757669   | NM_175540           | Eda2r              | ectodysplasin A2 isoform receptor                                               |
| 2.47015916  | -91.5479833 | NM_026007           | Eef1g              | eukaryotic translation elongation factor 1 gamma                                |
| -12.2224031 | 4.74296218  | NM_146015           | Efemp1             | epidermal growth factor-containing fibulin-like extracellular matrix protein 1  |
| -5.60794566 | 2.0536879   | XM_975315           | EG620393           | predicted gene, EG620393                                                        |
| -7.35603065 | -3.20176195 | NM_020578           | Ehd3               | EH-domain containing 3                                                          |
| 2.60335353  | 32.9675299  | NM_026114           | Eif2s1             | eukaryotic translation initiation factor 2, subunit 1 alpha                     |
| 13.1689546  | 2.84261677  | NM_012011           | Eif2s3y            | eukaryotic translation initiation factor 2, subunit 3, structural gene Y-linked |
| -13.8346663 | 2.09449737  | NM_007925           | Eln                | elastin                                                                         |
| -14.2696301 | -1123.38614 | NM_010330           | Emb                | embigin                                                                         |
| 2.44491073  | 21.9632078  | NM_145158           | Emilin2            | elastin microfibril interfacier 2                                               |
| 2.18375714  | 18.4988939  | NM_001043335        | Emi1               | echinoderm microtubule associated protein like 1                                |
| -2.80398556 | 3.75565124  | NM_007929           | Emp2               | epithelial membrane protein 2                                                   |
| 2.42088767  | 37.2228925  | NM_007932           | Eng                | endoglin                                                                        |
| 6.71411402  | 1.05068645  | NM_007933           | Eno3               | enolase 3, beta muscle                                                          |
| 2.29957582  | 29.86102    | ENSMUSG00000052528  | ENSMUSG00000050974 | predicted gene, ENSMUSG00000050974                                              |
| -2.34672439 | 3.04965148  | NM_001081471        | ENSMUSG00000058057 | predicted gene, ENSMUSG00000058057                                              |
| -4.44958332 | -372.794438 | ENSMUST000000099728 | ENSMUSG00000075047 | predicted gene, ENSMUSG00000075047                                              |
| 3.5011488   | 47.5508147  | NM_013813           | Epb4.1l3           | erythrocyte protein band 4.1-like 3                                             |
| 4.15921028  | 22.1948332  | NM_007936           | Epha4              | Eph receptor A4                                                                 |
| -3.0924697  | 2.99120309  | NM_007945           | Eps8               | epidermal growth factor receptor pathway substrate 8                            |
| 2.31834659  | 84.2558956  | ENSMUST00000022573  | Esd                | esterase D/formylglutathione hydrolase                                          |
| -6.02669033 | 1.48806445  | NM_007960           | Etv1               | ets variant gene 1                                                              |
| -2.79849677 | -35.962433  | NM_007963           | Evi1               | ecotropic viral integration site 1                                              |
| -2.71811134 | -11.6212132 | NM_010167           | Eya4               | eyes absent 4 homolog (Drosophila)                                              |
| -5.3650185  | 2.98840997  | NM_010171           | F3                 | coagulation factor III                                                          |
| -2.34361279 | -142.603862 | BC029204            | Fam176b            | family with sequence similarity 176, member B                                   |
| 2.87476252  | 6.53822219  | NM_019643           | Fam60a             | family with sequence similarity 60, member A                                    |
| -6.9830157  | -15.5876786 | NM_183221           | Fat4               | FAT tumor suppressor homolog 4 (Drosophila)                                     |
| -2.49404454 | 3.14682001  | NM_178624           | Fbx12              | F-box and leucine-rich repeat protein 2                                         |
| -3.56246061 | 5.16697662  | NM_010189           | Fcgrt              | Fc receptor, IgG, alpha chain transporter                                       |
| -2.47952859 | -4.96620075 | NM_199012           | Fchsd2             | FCH and double SH3 domains 2                                                    |
| -2.76745252 | 69.904968   | NM_1344605          | Fdps               | farnesyl diphosphate synthetase                                                 |
| -2.52452863 | -8.85498443 | NM_008005           | Fgf18              | fibroblast growth factor 18                                                     |
| -2.40632582 | 11.809684   | NM_008006           | Fgf2               | fibroblast growth factor 2                                                      |
| -5.33930872 | 4.87296067  | NM_010207           | Fgfr2              | fibroblast growth factor receptor 2                                             |
| 2.69517196  | 27.1411995  | NM_013902           | Fkbp3              | FK506 binding protein 3                                                         |
| -33.1504896 | -541.226129 | NM_021355           | Fmod               | fibromodulin                                                                    |
| 2.72257469  | 32.3105212  | NM_008031           | Fmr1               | fragile X mental retardation syndrome 1 homolog                                 |
| 5.11375993  | 22.8663634  | NM_010235           | Fos1               | fos-like antigen 1                                                              |
| -2.88562049 | -7.80592267 | NM_008037           | Fos2               | fos-like antigen 2                                                              |
| 2.8968763   | 5.80833188  | NM_013519           | Foxc2              | forkhead box C2                                                                 |
| -6.07803362 | -13.0948222 | NM_010426           | Foxf1a             | forkhead box F1a                                                                |
| -4.80612668 | -1.34450898 | ENSMUST00000098351  | Foxf1a             | forkhead box F1a                                                                |

|             |             |              |            |                                                                                                |
|-------------|-------------|--------------|------------|------------------------------------------------------------------------------------------------|
| 3.82068081  | -1.63810737 | NM_008241    | Foxg1      | forkhead box G1                                                                                |
| -19.4080727 | -7.97870768 | NM_053242    | Foxp2      | forkhead box P2                                                                                |
| -6.27944944 | -15.953822  | NM_011356    | Frzb       | frizzled-related protein                                                                       |
| -2.66493905 | 4.09339721  | NM_008046    | Fst        | follistatin                                                                                    |
| -12.5212319 | -40.6450838 | NM_052992    | Fxyd1      | FXD domain-containing ion transport regulator 1                                                |
| -2.36698637 | 2.92442021  | NM_021457    | Fzd1       | frizzled homolog 1 (Drosophila)                                                                |
| 7.31051605  | 3.60658055  | NM_010251    | Gabra4     | gamma-aminobutyric acid (GABA-A) receptor, subunit alpha 4                                     |
| 2.84232017  | 10.4096163  | NM_183358    | Gadd45gip1 | growth arrest and DNA-damage-inducible, gamma interacting protein 1                            |
| -3.93955127 | -10.1312226 | NM_199366    | Gal3st2    | galactose-3-O-sulfotransferase 2                                                               |
| 4.46623963  | 1.710252    | NM_173739    | Galnt4     | UDP-N-acetyl-alpha-D-galactosamine:polypeptide N-acetylgalactosaminyltransferase-like 4        |
| 2.6573246   | -22.7211991 | NM_010255    | Gamt       | guanidinoacetate methyltransferase                                                             |
| -29.3150972 | -4.7487228  | NM_019521    | Gas6       | growth arrest specific 6                                                                       |
| 4.47276867  | 85.3445634  | NM_010258    | Gata6      | GATA binding protein 6                                                                         |
| 5.02996533  | 4.55128788  | NM_025961    | Gatm       | glycine amidinotransferase (L-arginine:glycine amidinotransferase)                             |
| 3.36184399  | 1.68999276  | NM_010295    | Gclc       | glutamate-cysteine ligase, catalytic subunit                                                   |
| -34.4006266 | -942.840446 | NM_145741    | Gdf10      | growth differentiation factor 10                                                               |
| 3.08262984  | 28.5444325  | NM_010283    | Ggta1      | glycoprotein galactosyltransferase alpha 1, 3                                                  |
| 4.72826545  | 4.25085831  | NM_008126    | Gjb3       | gap junction protein, beta 3                                                                   |
| -2.68551353 | 10.3038712  | NM_031184    | Glis2      | GLIS family zinc finger 2                                                                      |
| -3.0647346  | 6.86742654  | NM_010299    | Gm2a       | GM2 ganglioside activator protein                                                              |
| 3.18240349  | -1.08667379 | BC157942     | Gm98       | gene model 98, (NCBI)                                                                          |
| 3.40737048  | -1.32800933 | NM_053110    | Gpnmb      | glycoprotein (transmembrane) nmb                                                               |
| 2.27112489  | 5.58823509  | NM_031999    | Gpr137b    | G protein-coupled receptor 137B                                                                |
| 3.33095456  | 11.0615946  | NM_022420    | Gprc5b     | G protein-coupled receptor, family C, group 5, member B                                        |
| -2.40568013 | 1.47572245  | NM_016719    | Grb14      | growth factor receptor bound protein 14                                                        |
| 3.59977516  | 17.2653268  | NM_011825    | Grem2      | gremlin 2 homolog, cysteine knot superfamily (Xenopus laevis)                                  |
| 6.08958146  | -1.4599179  | NM_010357    | Gsta4      | glutathione S-transferase, alpha 4                                                             |
| -2.39788548 | -3.99597386 | NM_008185    | Gstt1      | glutathione S-transferase, theta 1                                                             |
| -2.39335576 | 3.99180063  | NM_028450    | Gulp1      | GULP, engulfment adaptor PTB domain containing 1                                               |
| -2.74044478 | -123.020291 | NM_013755    | Gyg        | glycogenin                                                                                     |
| -4.22847139 | 11.3217303  | NM_010380    | H2-D1      | histocompatibility 2, D region locus 1                                                         |
| -2.41790166 | 3.99132323  | NM_001001892 | H2-K1      | histocompatibility 2, K1, K region                                                             |
| -3.05530618 | -76.2585968 | NM_010394    | H2-Q7      | histocompatibility 2, Q region locus 7                                                         |
| -2.91129869 | 13.4985631  | NM_173371    | H6pd       | hexose-6-phosphate dehydrogenase (glucose 1-dehydrogenase)                                     |
| 2.47470884  | 29.9089503  | NM_026115    | Hat1       | histone aminotransferase 1                                                                     |
| 2.26421343  | 7.57668448  | NM_008234    | Hells      | helicase, lymphoid specific                                                                    |
| -2.73093592 | 17.1266524  | NM_022331    | Herpud1    | homocysteine-inducible, endoplasmic reticulum stress-inducible, ubiquitin-like domain member 1 |
| 2.4948042   | 35.5156359  | NM_178218    | Hist3h2a   | histone cluster 3, H2a                                                                         |
| 2.59731884  | 13.419187   | NM_001025427 | Hmga1      | high mobility group AT-hook 1                                                                  |
| 2.27656668  | -4.11573089 | NM_008252    | Hmgb2      | high mobility group box 2                                                                      |
| -2.48657566 | -68.9068786 | NM_145942    | Hmgcs1     | 3-hydroxy-3-methylglutaryl-Coenzyme A synthase 1                                               |
| 2.45364217  | 10.9808943  | NM_010461    | Hoxb8      | homeo box B8                                                                                   |
| 2.26435434  | 23.7122935  | NM_013556    | Hprt1      | hypoxanthine guanine phosphoribosyl transferase 1                                              |
| -4.84444174 | 9.5431409   | NM_013868    | Hspb7      | heat shock protein family, member 7 (cardiovascular)                                           |
| -2.93406174 | 10.4422508  | NM_013559    | Hsph1      | heat shock 105kDa/110kDa protein 1                                                             |
| 2.9279557   | 26.8486457  | NM_010496    | Id2        | inhibitor of DNA binding 2                                                                     |
| -2.38023571 | 2.86739262  | NM_145360    | Idi1       | isopentenyl-diphosphate delta isomerase                                                        |
| -2.88673221 | 19.8777857  | NM_010512    | Igf1       | insulin-like growth factor 1                                                                   |
| 5.85679692  | -78.5654893 | NM_023670    | Igf2bp3    | insulin-like growth factor 2 mRNA binding protein 3                                            |
| -22.908864  | 8.9765592   | NM_008342    | Igfbp2     | insulin-like growth factor binding protein 2                                                   |
| -6.2123394  | -3.19517457 | NM_133990    | Il13ra1    | interleukin 13 receptor, alpha 1                                                               |
| -24.7426856 | -2.5747398  | NM_001025602 | Il1r1      | interleukin 1 receptor-like 1                                                                  |
| -2.56654373 | -5.59597678 | NM_010560    | Il6st      | interleukin 6 signal transducer                                                                |
| -6.35894533 | 11.3225103  | NM_133976    | Imp3       | IMP3, U3 small nucleolar ribonucleoprotein, homolog (yeast)                                    |
| 2.15016146  | 117.972361  | NM_008380    | Inhba      | inhibin beta-A                                                                                 |
| -3.53186326 | 3.5771917   | NM_153526    | Insig1     | insulin induced gene 1                                                                         |
| 2.16189235  | -1.98459721 | NM_023579    | Ipo5       | importin 5                                                                                     |
| -2.94966309 | -8.93030859 | NM_008394    | Irf9       | interferon regulatory factor 9                                                                 |
| -8.93985564 | -6.85909627 | NM_012043    | Islr       | immunoglobulin superfamily containing leucine-rich repeat                                      |
| -2.76785184 | 2.83924244  | NM_023627    | Isyna1     | myo-inositol 1-phosphate synthase A1                                                           |
| -6.16819053 | -2.27924866 | NM_001033228 | Itga1      | integrin alpha 1                                                                               |
| -6.45004633 | 5.39864638  | NM_176922    | Itga11     | integrin alpha 11                                                                              |
| -28.2920867 | 1.02305436  | NM_001001309 | Itga8      | integrin alpha 8                                                                               |
| -2.24275526 | 16.2591944  | NM_010580    | Itgb5      | integrin beta 5                                                                                |
| -4.27194665 | 4.40306092  | NM_145467    | Itgbl1     | integrin, beta-like 1                                                                          |
| 4.2613329   | 44.9686423  | NM_054102    | Ivns1abp   | influenza virus NS1A binding protein                                                           |
| 2.63258479  | 20.2975515  | NM_013822    | Jag1       | jagged 1                                                                                       |
| 5.32034693  | 88.0437739  | NM_023844    | Jam2       | junction adhesion molecule 2                                                                   |
| 3.07822226  | -11.8941754 | BC056964     | Josd3      | Josephin domain containing 3                                                                   |
| -2.34584811 | -33.6062639 | NM_010591    | Jun        | Jun oncogene                                                                                   |
| 5.0614382   | 12.0941894  | NM_010597    | Kcnab1     | potassium voltage-gated channel, shaker-related subfamily, beta member 1                       |
| -2.13392151 | 2.11981405  | NM_146188    | Kctd15     | potassium channel tetramerisation domain containing 15                                         |
| 2.37346803  | 33.747873   | NM_010615    | Kif11      | kinesin family member 11                                                                       |
| -2.52590699 | 10.3979333  | NM_021366    | Kif13      | Kruppel-like factor 13                                                                         |
| -3.08283877 | -1.08977879 | NM_144810    | Klhdc8a    | kelch domain containing 8A                                                                     |
| 9.10493649  | -1.92576767 | NM_008471    | Krt19      | keratin 19                                                                                     |
| -2.28389857 | 6.32757252  | NM_015771    | Lats2      | large tumor suppressor 2                                                                       |
| -2.17084814 | -6.43409392 | NM_008492    | Ldhd       | lactate dehydrogenase B                                                                        |
| -2.87062598 | 8.03301964  | NM_013534    | Leprel2    | leprecan-like 2                                                                                |
| -5.54049332 | 12.1076695  | NM_011150    | Lgals3bp   | lectin, galactoside-binding, soluble, 3 binding protein                                        |
| -4.79766842 | -12.5784062 | NM_001001980 | Limch1     | LIM and calponin homology domains 1                                                            |
| -2.49201163 | 6.25004707  | NM_144862    | Lims2      | LIM and senescent cell antigen like domains 2                                                  |
| -18.200033  | -1.97351197 | NM_201529    | Lmo7       | LIM domain only 7                                                                              |
| 4.44306282  | 3.95620761  | NM_173014    | Lpcat2     | lysophosphatidylcholine acyltransferase 2                                                      |
| -6.70312013 | -136.022664 | NM_001081298 | Lphn2      | latrophilin 2                                                                                  |
| 6.49042174  | 8.85329677  | NM_008509    | Lpl        | lipoprotein lipase                                                                             |
| -2.79128883 | 6.14034116  | NM_008514    | Lrp6       | low density lipoprotein receptor-related protein 6                                             |
| -2.23883018 | 11.6781027  | NM_013587    | Lrpap1     | low density lipoprotein receptor-related protein associated protein 1                          |
| -2.5281542  | -1.37928013 | NM_027164    | Lrrc27     | leucine rich repeat containing 27                                                              |
| 3.84392412  | -77.8245846 | NM_178725    | Lrrc4c     | leucine rich repeat containing 4C                                                              |
| -2.88088933 | 4.70014486  | NM_177736    | Lrrc61     | leucine rich repeat containing 61                                                              |
| -2.8822572  | 14.0253884  | NM_178701    | Lrrc8d     | leucine rich repeat containing 8D                                                              |
| -3.8935777  | -3.40584597 | NM_178005    | Lrrtm2     | leucine rich repeat transmembrane neuronal 2                                                   |
| 2.88387057  | 4.37862554  | NM_015816    | Lsm4       | LSM4 homolog, U6 small nuclear RNA associated (S. cerevisiae)                                  |
| -2.61010336 | 10.1822055  | NM_019391    | Lsp1       | lymphocyte specific 1                                                                          |

|             |             |                    |                    |                                                                                                  |
|-------------|-------------|--------------------|--------------------|--------------------------------------------------------------------------------------------------|
| -2.35059859 | 14.1946675  | NM_013589          | Ltbp2              | latent transforming growth factor beta binding protein 2                                         |
| -14.2944188 | -1074.44667 | Lum_008524         | Lum                | lumican                                                                                          |
| -2.20523863 | 2.72181206  | NM_011838          | Lynx1              | Ly6/neurotoxin 1                                                                                 |
| -2.81555527 | -7.36391088 | NM_001025577       | Maf                | avian musculoaponeurotic fibrosarcoma (v-maf) AS42 oncogene homolog                              |
| 2.3705811   | 2.66166839  | NM_026453          | Mak16              | MAK16 homolog (S. cerevisiae)                                                                    |
| -3.63372597 | 4.34288992  | NM_008548          | Man1a              | mannosidase 1, alpha                                                                             |
| -2.59887702 | 20.9065627  | NM_010763          | Man1a2             | mannosidase, alpha, class 1A, member 2                                                           |
| -2.68108781 | 3.86565928  | NM_207237          | Man1c1             | mannosidase, alpha, class 1C, member 1                                                           |
| 2.59915173  | 88.1269395  | NM_008549          | Man2a1             | mannosidase 2, alpha 1                                                                           |
| -3.53275776 | 15.7128414  | NM_001081357       | Map4k3             | mitogen-activated protein kinase kinase kinase kinase 3                                          |
| 2.50875336  | 15.7587351  | NM_010807          | Marcks1            | MARCKS-like 1                                                                                    |
| 2.3590724   | 29.7014246  | NM_011843          | Mbc2               | membrane bound C2 domain containing protein                                                      |
| 2.61459823  | 12.3622916  | NM_008564          | Mcm2               | minichromosome maintenance deficient 2 mitotin (S. cerevisiae)                                   |
| 2.72347431  | 24.9656026  | NM_008565          | Mcm4               | minichromosome maintenance deficient 4 homolog (S. cerevisiae)                                   |
| 3.39559894  | 26.4842539  | NM_008566          | Mcm5               | minichromosome maintenance deficient 5, cell division cycle 46 (S. cerevisiae)                   |
| 2.52730731  | 14.9435118  | NM_008568          | Mcm7               | minichromosome maintenance deficient 7 (S. cerevisiae)                                           |
| -2.8698965  | -184.729952 | NM_010784          | Mdk                | midkine                                                                                          |
| -2.22275495 | 9.87275401  | NM_172424          | Med13l             | mediator complex subunit 13-like                                                                 |
| -2.23102542 | -5.76216217 | NM_025282          | Mef2c              | myocyte enhancer factor 2C                                                                       |
| -2.3327506  | 7.66485167  | NM_133665          | Mef2d              | myocyte enhancer factor 2D                                                                       |
| 4.42388871  | 68.3389851  | NM_010825          | Meis2              | Meis homeobox 2                                                                                  |
| -100.454794 | -2.54869743 | NM_008590          | Mest               | mesoderm specific transcript                                                                     |
| 3.93536874  | -3.58101128 | NM_008591          | Met                | met proto-oncogene                                                                               |
| -3.88170325 | -2.24773269 | NM_027334          | Mettl7a1           | methyltransferase like 7A1                                                                       |
| -10.3339864 | -20.2734489 | NM_008546          | Mfap2              | microfibrillar-associated protein 2                                                              |
| 8.5851637   | 4.22692098  | NM_027756          | Mfap3l             | microfibrillar-associated protein 3-like                                                         |
| -2.93177495 | 3.48997407  | NM_015776          | Mfap5              | microfibrillar associated protein 5                                                              |
| -2.57523273 | 11.979228   | NM_008597          | Mgp                | matrix Gla protein                                                                               |
| -3.44597454 | 2.38136024  | NM_010797          | Mid1               | midline 1                                                                                        |
| 2.56292318  | -5.3193816  | NM_010798          | Mif                | macrophage migration inhibitory factor                                                           |
| 2.60763028  | 44.5979814  | NM_026178          | Mmd                | monocyte to macrophage differentiation-associated                                                |
| -11.9450095 | -1094.33294 | NM_010816          | Morc1              | microrchidia 1                                                                                   |
| -3.19562366 | -10.2277681 | NM_010826          | Mrv1               | MRV integration site 1                                                                           |
| -8.26254424 | 3.45231941  | NM_013602          | Mt1                | metallothionein 1                                                                                |
| -33.0383692 | -3.88987888 | NM_008630          | Mt2                | metallothionein 2                                                                                |
| 3.62114259  | 32.9066163  | NM_008634          | Mtap1b             | microtubule-associated protein 1B                                                                |
| 2.17559859  | 3.97677049  | NM_175541          | Mum11              | melanoma associated antigen (mutated) 1-like 1                                                   |
| 2.92835001  | 37.7908694  | NM_010852          | Myef2              | myelin basic protein expression factor 2, repressor                                              |
| -12.2604259 | 2.48492883  | NM_013607          | Myh11              | myosin, heavy polypeptide 11, smooth muscle                                                      |
| -2.49917512 | -5.47144844 | NM_153789          | Myli1              | myosin regulatory light chain interacting protein                                                |
| -11.0376561 | -47.8509752 | NM_139300          | Myk                | myosin, light polypeptide kinase                                                                 |
| -3.19945312 | 12.2707978  | NM_177390          | Myo1d              | myosin ID                                                                                        |
| -2.58252616 | -179.129707 | NM_181072          | Myo1e              | myosin IE                                                                                        |
| -4.45326006 | -14.0512439 | NM_010867          | Myom1              | myomesin 1                                                                                       |
| 2.77036308  | 23.1230868  | NM_173437          | Nav1               | neuron navigator 1                                                                               |
| -3.66712495 | 5.46232568  | NM_008675          | Nbl1               | neuroblastoma, suppression of tumorigenicity 1                                                   |
| 2.39658082  | 18.603071   | NM_146171          | Ncapd2             | non-SMC condensin I complex, subunit D2                                                          |
| -4.03909432 | -1.5713663  | NM_010882          | Ndn                | neccdin                                                                                          |
| -2.83342672 | -63.3636334 | NM_025383          | Necap2             | NECAP endocytosis associated 2                                                                   |
| 2.44454738  | -1.70711447 | NM_001114386       | Nedd4l             | neural precursor cell expressed, developmentally down-regulated gene 4-like                      |
| -2.90218985 | 6.43698691  | NM_001111324       | Nedd9              | neural precursor cell expressed, developmentally down-regulated gene 9                           |
| -3.55606267 | -2.01620785 | NM_001113209       | Nfib               | nuclear factor I/B                                                                               |
| 2.73844119  | 55.3734648  | NM_009750          | Ngfrap1            | nerve growth factor receptor (TNFRSF16) associated protein 1                                     |
| 2.42912668  | -2.26362971 | NM_010917          | Nid1               | nidogen 1                                                                                        |
| 3.0391795   | 48.4802275  | NM_008708          | Nmt2               | N-methyltransferase 2                                                                            |
| 2.29596031  | 37.4886542  | NM_053086          | Nolc1              | nucleolar and coiled-body phosphoprotein 1                                                       |
| -2.17074933 | -11.7985551 | NM_015760          | Nox4               | NADPH oxidase 4                                                                                  |
| 4.11428947  | -4.29299459 | NM_010934          | Npy1r              | neuropeptide Y receptor Y1                                                                       |
| -3.65098182 | 3.56131723  | NM_178591          | Nrg1               | neuregulin 1                                                                                     |
| 2.5240705   | 23.2208955  | NM_153529          | Nrn1               | neuritin 1                                                                                       |
| -5.48901347 | 5.29630528  | NM_010942          | Nsg1               | neuron specific gene family member 1                                                             |
| -2.50898569 | -6.30834074 | NM_008742          | Ntf3               | neurotrophin 3                                                                                   |
| -3.48697874 | 6.00345462  | NM_016773          | Nucb2              | nucleobindin 2                                                                                   |
| -2.44017766 | 10.153869   | NM_010950          | Numb1              | numb-like                                                                                        |
| 2.26864096  | 11.820126   | NM_133227          | Nup155             | nucleoporin 155                                                                                  |
| 2.2114518   | 45.3268186  | AK129093           | Nup205             | nucleoporin 205                                                                                  |
| 2.23874762  | -10.084054  | NM_172394          | Nup88              | nucleoporin 88                                                                                   |
| -4.06683673 | -6.78501661 | NM_019738          | Nupr1              | nuclear protein 1                                                                                |
| -3.83634328 | 7.17030775  | NM_133859          | Olfml3             | olfactomedin-like 3                                                                              |
| 3.16667109  | 14.9630889  | NM_181848          | Optn               | optineurin                                                                                       |
| 2.46188534  | 11.562332   | NM_019716          | Orc6l              | origin recognition complex, subunit 6-like (S. cerevisiae)                                       |
| -2.68585002 | -171.758409 | AY033899           | ORF63              | open reading frame 63                                                                            |
| -28.4659323 | -12.2880968 | NR_003564          | OTTMUSG00000001305 | predicted gene, OTTMUSG00000001305                                                               |
| 3.633975    | 39.6326341  | XR_032580          | OTTMUSG00000005793 | predicted gene, OTTMUSG00000005793                                                               |
| 3.49162508  | -1.76077193 | NM_001085549       | OTTMUSG00000008561 | predicted gene, OTTMUSG00000008561                                                               |
| -2.67837617 | -576.981497 | BC024323           | OTTMUSG00000010657 | predicted gene, OTTMUSG00000010657                                                               |
| 3.04140316  | 7.8646796   | NM_001085522       | OTTMUSG00000011097 | predicted gene, OTTMUSG00000011097                                                               |
| -3.13602116 | -216.510562 | ENSMUST00000100373 | OTTMUSG00000011664 | predicted gene, OTTMUSG00000011664                                                               |
| 3.60493818  | 37.1298869  | NM_001101804       | OTTMUSG00000016611 | predicted gene, OTTMUSG00000016611                                                               |
| -2.11120793 | -10.2637483 | NM_177161          | P4ha3              | procollagen-proline, 2-oxoglutarate 4-dioxygenase (proline 4-hydroxylase), alpha polypeptide III |
| -19.7174596 | -7.41586528 | NM_023245          | Palmd              | palmdelphin                                                                                      |
| -2.33958608 | 29.7513767  | NM_013626          | Pam                | peptidylglycine alpha-amidating monooxygenase                                                    |
| -3.09186889 | -1.75352907 | NM_054056          | Pawr               | PRKC, apoptosis, WT1, regulator                                                                  |
| -3.48903756 | -3.97202971 | NM_016768          | Pbx3               | pre B-cell leukemia transcription factor 3                                                       |
| 12.2099981  | -2.95381159 | NM_029620          | Pcolce2            | procollagen C-endopeptidase enhancer 2                                                           |
| -3.82183245 | 2.23141028  | ENSMUST00000055576 | Pcsk6              | proprotein convertase subtilisin/kexin type 6                                                    |
| 3.346828    | 11.0399438  | NM_008795          | Pctk3              | PCTAIRE-motif protein kinase 3                                                                   |
| -4.4933286  | 2.13449404  | NM_019971          | Pdgfc              | platelet-derived growth factor, C polypeptide                                                    |
| -11.1238009 | -1.81962295 | NM_011058          | Pdgfra             | platelet derived growth factor receptor, alpha polypeptide                                       |
| 4.34348397  | 22.9591772  | NM_013743          | Pdk4               | pyruvate dehydrogenase kinase, isoenzyme 4                                                       |
| -4.38837183 | 1.3638923   | NM_028460          | Pear1              | platelet endothelial aggregation receptor 1                                                      |
| 6.46576278  | 12.332916   | NM_173019          | Pfkfb4             | 6-phosphofructo-2-kinase/fructose-2,6-biphosphatase 4                                            |
| -4.65174212 | 6.08585973  | NM_001077495       | Pik3r1             | phosphatidylinositol 3-kinase, regulatory subunit, polypeptide 1 (p85 alpha)                     |
| 2.93756972  | 21.0170561  | NM_027153          | Pir                | pirin                                                                                            |
| 2.61960813  | 18.5670002  | NM_145131          | Pitrm1             | pitriylsin metallepidase 1                                                                       |

|             |             |              |          |                                                                                                   |
|-------------|-------------|--------------|----------|---------------------------------------------------------------------------------------------------|
| 2.70742019  | 16.977952   | NM_008862    | Pkia     | protein kinase inhibitor, alpha                                                                   |
| 2.66911744  | 5.75786033  | NM_019645    | Pkp1     | plakophilin 1                                                                                     |
| -2.5235859  | 14.3831992  | NM_008869    | Pla2g4a  | phospholipase A2, group IVA (cytosolic, calcium-dependent)                                        |
| -6.10108684 | -64.6875926 | NM_207222    | Plac9    | placenta specific 9                                                                               |
| 2.2185976   | -2.1686043  | NM_008872    | Plat     | plasminogen activator, tissue                                                                     |
| -63.75301   | -939.930722 | NM_019588    | Plce1    | phospholipase C, epsilon 1                                                                        |
| -2.5220986  | 16.5295258  | NM_011116    | Pld3     | phospholipase D family, member 3                                                                  |
| -7.72792183 | 1.31991055  | NM_177606    | Plekhh2  | pleckstrin homology domain containing, family H (with MyTH4 domain) member 2                      |
| 2.4348125   | 24.1595972  | NM_011125    | Pltp     | phospholipid transfer protein                                                                     |
| -11.6954646 | 7.75128236  | NM_026162    | Plxdc2   | plexin domain containing 2                                                                        |
| 2.40107035  | 16.317391   | NM_025443    | Pno1     | partner of NOB1 homolog ( <i>S. cerevisiae</i> )                                                  |
| -2.65489389 | 5.10052062  | NM_026383    | Pnrc2    | proline-rich nuclear receptor coactivator 2                                                       |
| 2.51247405  | -1.59203178 | NM_011133    | Pole2    | polymerase (DNA directed), epsilon 2 (p59 subunit)                                                |
| -4.91928659 | -50.3991609 | NM_008247    | Ppap2a   | phosphatidic acid phosphatase 2a                                                                  |
| -2.56647761 | -7.82578885 | NM_001098230 | Ppm2c    | protein phosphatase 2C, magnesium dependent, catalytic subunit                                    |
| -5.81199978 | 8.82646941  | NM_054077    | Prelp    | proline arginine-rich end leucine-rich repeat                                                     |
| 2.4818103   | 31.3669998  | NM_182997    | Prkab2   | protein kinase, AMP-activated, beta 2 non-catalytic subunit                                       |
| 4.42894717  | -9.9475545  | NM_011158    | Prkar2b  | protein kinase, cAMP dependent regulatory, type II beta                                           |
| 2.18542251  | 14.2322506  | NM_011103    | Prkcd    | protein kinase C, delta                                                                           |
| 148.183021  | -3.15733857 | NM_011118    | Prl2c3   | prolactin family 2, subfamily c, member 3                                                         |
| 126.424451  | 14.6804438  | NM_181852    | Prl2c5   | prolactin family 2, subfamily c, member 5                                                         |
| -2.54109996 | -9.73959267 | NM_080469    | Prnpip1  | prion protein interacting protein 1                                                               |
| -2.19562972 | 2.90650457  | NM_011173    | Pros1    | protein S (alpha)                                                                                 |
| 2.18068081  | 16.084069   | NM_138659    | Prpf8    | pre-mRNA processing factor 8                                                                      |
| 2.54860209  | 26.5911163  | NM_175563    | Prr11    | proline rich 11                                                                                   |
| 2.64184472  | 16.6961062  | BC147835     | Prr6     | proline-rich polypeptide 6                                                                        |
| -2.22472683 | 15.4906872  | NM_011197    | Ptgrn    | prostaglandin F2 receptor negative regulator                                                      |
| -6.05427907 | 4.57881874  | NM_025760    | Ptplad2  | protein tyrosine phosphatase-like A domain containing 2                                           |
| 3.87519483  | 14.734608   | NM_029928    | Ptprb    | protein tyrosine phosphatase, receptor type, B                                                    |
| -2.25950745 | 11.3982169  | NM_008999    | Rab23    | RAB23, member RAS oncogene family                                                                 |
| 4.56252367  | 34.9842067  | NM_001003950 | Rab3ip   | RAB3A interacting protein                                                                         |
| -2.85877562 | 6.44701332  | NM_133223    | Rac3     | RAS-related C3 botulinum substrate 3                                                              |
| -2.40065972 | 1.83294635  | NM_133832    | Rdh10    | retinol dehydrogenase 10 (all-trans)                                                              |
| -3.07869574 | 13.1151677  | NM_016678    | Reck     | reversion-inducing-cysteine-rich protein with kazal motifs                                        |
| -2.29961553 | -186.728308 | NM_181397    | Rftn1    | raftlin lipid raft linker 1                                                                       |
| -5.27758648 | 3.59323327  | NM_016846    | Rgl1     | ral guanine nucleotide dissociation stimulator, like 1                                            |
| 2.55334052  | 48.890503   | NM_007483    | Rhob     | ras homolog gene family, member B                                                                 |
| 2.3982263   | 16.0451786  | NM_145417    | Rnpep    | arginyl aminopeptidase (aminopeptidase B)                                                         |
| -4.00210976 | 3.41576862  | NM_013846    | Ror2     | receptor tyrosine kinase-like orphan receptor 2                                                   |
| 4.40555595  | 7.79361135  | AF357384     | Rpl23    | ribosomal protein L23                                                                             |
| 2.5647497   | -48.7439765 | BC086890     | Rpl30    | ribosomal protein L30                                                                             |
| 2.13982033  | 8.94819442  | NM_009088    | Rpo1-4   | RNA polymerase 1-4                                                                                |
| 3.24110623  | -8.3438364  | NM_011299    | Rps6ka2  | ribosomal protein S6 kinase, polypeptide 2                                                        |
| 2.2495031   | 36.3353442  | NM_009103    | Rrm1     | ribonucleotide reductase M1                                                                       |
| 3.56338999  | 13.8678365  | NM_009104    | Rrm2     | ribonucleotide reductase M2                                                                       |
| 2.75873672  | 21.0484748  | NM_172815    | Rspo2    | R-spondin 2 homolog ( <i>Xenopus laevis</i> )                                                     |
| -14.0443821 | -34.3265946 | NM_028351    | Rspo3    | R-spondin 3 homolog ( <i>Xenopus laevis</i> )                                                     |
| -3.26136569 | 6.5525904   | NM_172604    | Scara3   | scavenger receptor class A, member 3                                                              |
| 9.55407991  | 44.7923982  | NM_022886    | Sccl     | sclellin                                                                                          |
| -4.25899256 | 5.15170285  | NM_011322    | Scn1b    | sodium channel, voltage-gated, type I, beta                                                       |
| -2.24835375 | 10.8076296  | NM_011342    | Sec22b   | SEC22 vesicle trafficking protein homolog B ( <i>S. cerevisiae</i> )                              |
| -2.50291463 | 10.4961581  | NM_009152    | Sema3a   | sema domain, immunoglobulin domain (Ig), short basic domain, secreted, (semaphorin) 3A            |
| -7.94477652 | 1.93742692  | NM_013657    | Sema3c   | sema domain, immunoglobulin domain (Ig), short basic domain, secreted, (semaphorin) 3C            |
| -3.40006221 | 2.66257692  | NM_011349    | Sema3f   | sema domain, immunoglobulin domain (Ig), short basic domain, secreted, (semaphorin) 3F            |
| -2.28193617 | -1.79777295 | NM_009155    | Sepp1    | selenoprotein P, plasma, 1                                                                        |
| -3.01059575 | 8.9346945   | NM_009156    | Sepw1    | selenoprotein W, muscle 1                                                                         |
| -3.49082927 | -1.03193086 | NM_025429    | Serpib1a | serine (or cysteine) peptidase inhibitor, clade B, member 1a                                      |
| -96.0603226 | -2.11506633 | NM_009255    | Serpine2 | serine (or cysteine) peptidase inhibitor, clade E, member 2                                       |
| -22.0250411 | -18.2685332 | NM_009776    | Serping1 | serine (or cysteine) peptidase inhibitor, clade G, member 1                                       |
| -4.98764328 | -1.6804337  | NM_030261    | Sesn3    | sestrin 3                                                                                         |
| 2.14320384  | 45.2353685  | AB015613     | Set      | SET translocation                                                                                 |
| 2.53570384  | 19.3974623  | NM_133953    | Sf3b3    | splicing factor 3b, subunit 3                                                                     |
| 2.23400936  | -3.03360415 | NM_028232    | Sgol1    | shugoshin-like 1 ( <i>S. pombe</i> )                                                              |
| 4.01582912  | 86.1407618  | NM_011894    | Sh3bp5   | SH3 domain binding protein 5 (BTK-associated)                                                     |
| 3.12393871  | 5.30668743  | NM_021506    | Sh3rf1   | SH3 domain containing ring finger 1                                                               |
| -2.68208457 | 1.28976901  | NM_001113331 | Shc1     | src homology 2 domain-containing transforming protein C1                                          |
| 7.2476894   | 6.40178209  | NM_172900    | Siglecg  | sialic acid binding Ig-like lectin G                                                              |
| -2.58006747 | 6.8158843   | NM_011385    | Ski      | ski sarcoma viral oncogene homolog (avian)                                                        |
| -4.13673314 | 2.97761287  | NM_146136    | Slc16a4  | solute carrier family 16 (monocarboxylic acid transporters), member 4                             |
| -2.65567807 | 6.62762424  | NM_009200    | Slc1a6   | solute carrier family 1 (high affinity aspartate/glutamate transporter), member 6                 |
| -3.53330051 | 8.95959038  | NM_025286    | Slc31a2  | solute carrier family 31, member 2                                                                |
| -2.77772106 | -8.76875455 | NM_172289    | Slc36a4  | solute carrier family 36 (proton/amino acid symporter), member 4                                  |
| 2.69319963  | 17.028815   | NM_134086    | Slc38a1  | solute carrier family 38, member 1                                                                |
| 15.0806179  | -1.23165209 | NM_027052    | Slc38a4  | solute carrier family 38, member 4                                                                |
| -3.39745757 | -69.9624788 | NM_013901    | Slc39a1  | solute carrier family 39 (zinc transporter), member 1                                             |
| 2.39718874  | -3.14252341 | NM_172653    | Slc39a10 | solute carrier family 39 (zinc transporter), member 10                                            |
| -2.64268106 | 4.63407069  | NM_008135    | Slc6a9   | solute carrier family 6 (neurotransmitter transporter, glycine), member 9                         |
| 4.89925605  | 47.3284383  | NM_033314    | Slco2a1  | solute carrier organic anion transporter family, member 2a1                                       |
| -15.4002368 | -7.24256704 | NM_011412    | Slit3    | slit homolog 3 ( <i>Drosophila</i> )                                                              |
| 2.69218409  | 13.4391994  | NM_008542    | Smad6    | MAD homolog 6 ( <i>Drosophila</i> )                                                               |
| 2.55147865  | 27.1631451  | NM_001042660 | Smad7    | MAD homolog 7 ( <i>Drosophila</i> )                                                               |
| -2.23998244 | 14.3999424  | NM_011416    | Smarca2  | SWI/SNF related, matrix associated, actin dependent regulator of chromatin, subfamily a, member 2 |
| 3.50193395  | 31.2451227  | NM_022316    | Smoc1    | SPARC related modular calcium binding 1                                                           |
| -4.98881868 | -228.376271 | NM_020561    | Smpdl3a  | sphingomyelin phosphodiesterase, acid-like 3A                                                     |
| -3.8243366  | 1.04545483  | NM_011430    | Sncg     | synuclein, gamma                                                                                  |
| -2.68399184 | 11.0713731  | NR_000002    | Snord32a | small nucleolar RNA, C/D box 32A                                                                  |
| -2.88997443 | -37.1061041 | NM_133741    | Snrk     | SNF related kinase                                                                                |
| -8.7499908  | 2.40083234  | NM_178374    | Snurpn   | snurportin 1                                                                                      |
| -22.4425679 | -178.240907 | NM_175483    | Snx33    | sorting nexin 33                                                                                  |
| -2.5832069  | -11.2341849 | NM_175407    | Sobp     | sine oculis-binding protein homolog ( <i>Drosophila</i> )                                         |
| -17.7268278 | -2.52687009 | NM_011435    | Sod3     | superoxide dismutase 3, extracellular                                                             |
| -2.49095251 | 19.6615697  | NM_172752    | Sorbs2   | sorbin and SH3 domain containing 2                                                                |
| 2.82294443  | 4.91091189  | NM_009238    | Sox4     | SRY-box containing gene 4                                                                         |
| -3.16763965 | -7.84863291 | NM_011451    | Sphk1    | sphingosine kinase 1                                                                              |
| 4.54292769  | -50.1331339 | NM_133903    | Spon2    | spondin 2, extracellular matrix protein                                                           |

|             |             |              |           |                                                                            |
|-------------|-------------|--------------|-----------|----------------------------------------------------------------------------|
| -79.0358566 | -1.1366749  | NM_009263    | Spp1      | secreted phosphoprotein 1                                                  |
| 14.5050711  | -57.0889731 | NM_009264    | Spr1a     | small proline-rich protein 1A                                              |
| -2.76104751 | -14.0855228 | NM_019990    | Stard10   | START domain containing 10                                                 |
| -2.36734053 | -19.2484582 | NM_023377    | Stard5    | STAR-related lipid transfer (START) domain containing 5                    |
| 3.44757123  | 5.12356352  | NM_027399    | Steap1    | six transmembrane epithelial antigen of the prostate 1                     |
| 2.42958139  | 52.3956568  | NM_001103157 | Steap2    | six transmembrane epithelial antigen of prostate 2                         |
| -9.53567886 | -193.979342 | NM_001085409 | Steap3    | STEAP family member 3                                                      |
| -2.48551327 | 10.9221506  | NM_019641    | Stmn1     | stathmin 1                                                                 |
| -5.2646922  | -59.489418  | NM_172294    | Sulf1     | sulfatase 1                                                                |
| 2.61294498  | 21.7773756  | NM_028072    | Sulf2     | sulfatase 2                                                                |
| 2.88924658  | 6.50966417  | NM_178652    | Supt3h    | suppressor of Ty 3 homolog (S. cerevisiae)                                 |
| -3.49159334 | 9.02143705  | NM_022814    | Svep1     | sushi, von Willebrand factor type A, EGF and pentraxin domain containing 1 |
| -7.47479567 | -70.8446082 | NM_023485    | Sync      | syncoilin                                                                  |
| -2.33456926 | 1.99945461  | NM_001109975 | Synpo     | synaptopodin                                                               |
| 4.77049439  | 7.04104205  | NM_030725    | Syt13     | synaptotagmin XIII                                                         |
| -2.37091264 | 3.49234111  | NM_001025313 | Tapbp     | TAP binding protein                                                        |
| -3.70551242 | 17.6198892  | NM_013685    | Tcf4      | transcription factor 4                                                     |
| 3.70395049  | -1.38063707 | NM_207176    | Tes       | testis derived transcript                                                  |
| 2.57418591  | -2.69812608 | NM_011638    | Tfrc      | transferrin receptor                                                       |
| -7.18670215 | -103.831387 | NM_009371    | Tgfb2     | transforming growth factor, beta receptor II                               |
| -7.92579764 | -74.2280008 | NM_009378    | Thbd      | thrombomodulin                                                             |
| -7.06664175 | 3.940153    | NM_009382    | Thy1      | thymus cell antigen 1, theta                                               |
| 2.34832627  | 134.981628  | NM_011595    | Timp3     | tissue inhibitor of metalloproteinase 3                                    |
| 2.39568517  | -5.36650722 | NM_028751    | Tjap1     | tight junction associated protein 1                                        |
| 2.44724054  | -10.8546265 | NM_008536    | Tm4sf1    | transmembrane 4 superfamily member 1                                       |
| -2.28521197 | 6.08203364  | NM_026211    | Tmed9     | transmembrane emp24 protein transport domain containing 9                  |
| 2.07580038  | 10.7570296  | NM_146162    | Tmem19    | transmembrane protein 119                                                  |
| -2.50716702 | -20.3107818 | BC046640     | Tmem173   | transmembrane protein 173                                                  |
| -9.95485521 | -6.34681593 | NM_025326    | Tmem176a  | transmembrane protein 176A                                                 |
| -2.31013742 | 27.9708985  | NM_019631    | Tmem45a   | transmembrane protein 45a                                                  |
| -9.45964152 | -23.2058381 | NM_198967    | Tmct1     | transmembrane and tetra-tryptophan repeat containing 1                     |
| -2.8265241  | -72.7369474 | NM_008764    | Tnfrsf11b | tumor necrosis factor receptor superfamily, member 11b (osteoprotegerin)   |
| -2.13008652 | 3.21377537  | NM_011610    | Tnfrsf1b  | tumor necrosis factor receptor superfamily, member 1b                      |
|             | 21.602052   | -4.36959673  | Tnfrsf18  | tumor necrosis factor (ligand) superfamily, member 18                      |
| 5.35524472  | 2.29783852  | NM_011619    | Tnnt2     | troponin T2, cardiac                                                       |
| 3.06294067  | 4.1288485   | NM_178716    | Tnpo1     | transporin 1                                                               |
| 2.08573736  | 4.92804823  | NM_011623    | Top2a     | topoisomerase (DNA) II alpha                                               |
| 2.50237768  | 35.9772596  | NM_031172    | Trim17    | tripartite motif-containing 17                                             |
| -2.23548437 | 10.2341123  | NM_178111    | Trp53inp2 | transformation related protein 53 inducible nuclear protein 2              |
| -11.6022154 | -10.5447215 | NM_032000    | Trps1     | trichorhinophalangeal syndrome I (human)                                   |
| -2.39705301 | 33.9706115  | NM_019656    | Tspan6    | tetraspanin 6                                                              |
| 3.91411326  | 34.1622568  | NM_023716    | Tubb2b    | tubulin, beta 2b                                                           |
| 8.70287105  | 4.02423552  | NM_011656    | Tuft1     | tuftelin 1                                                                 |
| 6.61682621  | 15.9423662  | NM_007855    | Twist2    | twist homolog 2 (Drosophila)                                               |
| -2.11572019 | 8.3839355   | NM_023053    | Twsg1     | twisted gastrulation homolog 1 (Drosophila)                                |
| -2.58548043 | 2.26744148  | NM_172597    | Txndc16   | thioredoxin domain containing 16                                           |
| 3.61770007  | -17.8387671 | NM_001042523 | Txnrd1    | thioredoxin reductase 1                                                    |
| 2.26629447  | 13.5801235  | NM_010931    | Uhrf1     | ubiquitin-like, containing PHD and RING finger domains, 1                  |
| 5.34336048  | 45.3697932  | NM_029770    | Unc5b     | unc-5 homolog B (C. elegans)                                               |
| 2.51483724  | 49.8022362  | NM_016872    | Vamp5     | vesicle-associated membrane protein 5                                      |
| 2.46127974  | 19.5482146  | NM_011690    | Vars      | valyl-tRNA synthetase                                                      |
| 7.6218771   | 43.4480396  | NM_001081249 | Vcan      | versican                                                                   |
| 8.3955846   | -26.8884147 | NM_009504    | Vdr       | vitamin D receptor                                                         |
| -3.06401327 | -22.4461419 | NM_013703    | Vldlr     | very low density lipoprotein receptor                                      |
| 17.8629316  | -28.7389369 | NM_033560    | Vps37a    | vacuolar protein sorting 37A (yeast)                                       |
| -2.92937369 | 4.80268173  | NM_172767    | Vwa5a     | von Willebrand factor A domain containing 5A                               |
| 2.20989623  | 4.20943518  | NM_172598    | Wdhd1     | WD repeat and HMG-box DNA binding protein 1                                |
| 4.09588403  | -12.1135758 | NM_020603    | Wdr46     | WD repeat domain 46                                                        |
| 2.51013803  | 38.8065191  | NM_019653    | Wsb1      | WD repeat and SOCS box-containing 1                                        |
| -3.32957433 | 2.49510758  | NM_026875    | Ypel3     | yippee-like 3 (Drosophila)                                                 |
| -2.3596896  | -11.9855931 | NM_146073    | Zdhhc14   | zinc finger, DHHC domain containing 14                                     |
| -3.25177642 | 2.45767046  | NM_001017968 | Zdhhc18   | zinc finger, DHHC domain containing 18                                     |
| 3.27552418  | -1.46098457 | NM_001081068 | Zfp294    | zinc finger protein 294                                                    |
| -2.2663706  | 1.57650527  | NM_013922    | Zfp354c   | zinc finger protein 354C                                                   |
| 4.25415342  | -3.23640108 | NM_009569    | Zfpm1     | zinc finger protein, multitype 1                                           |
| -2.55885469 | -149.148869 | BC021311     | Zswim6    | zinc finger, SWIM domain containing 6                                      |
| 2.869457    | 53.4915284  | NM_025635    | Zwint     | ZW10 interactor                                                            |
