# Supplementary material
Source: PubMed Central journal article supplement (PMC4200000)
Supplement: tableS2.pdf [file tableS2.pdf]

**Supplemental Table 2. Fold Change in Gene Expression  
Belomycin treated vs. Vehicle Control**

|                   | Accession          | Gene Symbol     | Gene Description                                               |
|-------------------|--------------------|-----------------|----------------------------------------------------------------|
| <b>18.669702</b>  | <b>NM_133871</b>   | <b>Ifi44</b>    | <b>interferon-induced protein 44</b>                           |
| <b>7.619522</b>   | <b>NM_023386</b>   | <b>Rtp4</b>     | <b>receptor transporter protein 4</b>                          |
| -6.76966527       | NM_001099298       | Scn2a1          | sodium channel, voltage-gated, type II, alpha 1                |
| -11.6962569       | XM_975226          | Naaladl2        | N-acetylated alpha-linked acidic dipeptidase-like 2            |
| 7.119591667       | NM_001161432       | Eda2r           | ectodysplasin A2 isoform receptor                              |
| -16.5455518       | NM_011126          | Plunc           | palate, lung, and nasal epithelium associated                  |
| 5.952082404       | NM_021394          | Zbp1            | Z-DNA binding protein 1                                        |
| 5.387052033       | NM_021384          | Rsad2           | radical S-adenosyl methionine domain containing 2              |
| 8.221809814       | NM_013473          | Anxa8           | annexin A8 (basal cell marker?)                                |
| <b>5.2005565</b>  | <b>NM_016850</b>   | <b>Irf7</b>     | <b>interferon regulatory factor 7</b>                          |
| <b>5.1510552</b>  | <b>NM_198095</b>   | <b>Bst2</b>     | <b>STRO-1 MSC antigen</b>                                      |
| 4.101924677       | NM_029017          | Mrpl47          | mitochondrial ribosomal protein L47                            |
| <b>3.9708518</b>  | <b>NM_011150</b>   | <b>Lgals3bp</b> | <b>lectin, galactoside-binding, soluble, 3 binding protein</b> |
| 3.651457655       | NM_011854          | Oasl2           | 2'-5' oligoadenylate synthetase-like 2                         |
| 4.23280052        | NM_008651          | Mybl1           | myeloblastosis oncogene-like 1                                 |
| 4.000384022       | NM_015783          | Isg15           | ISG15 ubiquitin-like modifier                                  |
| <b>3.3203009</b>  | <b>NM_00114627</b> | <b>Iigp1</b>    | <b>interferon inducible GTPase 1</b>                           |
| 3.645611938       | NM_016785          | Tpmt            | thiopurine methyltransferase                                   |
| 10.62575538       | AF357363           | Snord16a        | small nucleolar RNA, C/D box 16A                               |
| <b>3.1383723</b>  | <b>NM_172689</b>   | <b>Ddx58</b>    | <b>DEAD (Asp-Glu-Ala-Asp) box polypeptide 58</b>               |
| 4.073577907       | NM_025480          | Tmem128         | transmembrane protein 128                                      |
| 5.382280203       | NM_178695          | Prrg4           | proline rich Gla (G-carboxyglutamic acid) 4 (transmembrane)    |
| 2.93211665        | NM_144861          | Rprd1a          | regulation of nuclear pre-mRNA domain containing 1A            |
| 6.410540492       | NM_016982          | Vpreb1          | pre-B lymphocyte gene 1                                        |
| 4.646474531       | NM_007915          | Ei24            | etoposide induced 2.4 mRNA                                     |
| -2.85894725       | NM_001039244       | Gm7120          | predicted gene 7120                                            |
| 2.890388661       | NM_018734          | Gbp3            | guanylate binding protein 3                                    |
| 5.123254287       | NM_153592          | Erlin2          | ER lipid raft associated 2                                     |
| <b>5.9029802</b>  | <b>NM_009855</b>   | <b>Cd80</b>     | <b>CD80 antigen</b>                                            |
| 2.820967412       | NM_013750          | Phlda3          | pleckstrin homology-like domain, family A, member 3            |
| 3.26673743        | NR_004419          | Rny1            | RNA, Y1 small cytoplasmic, Ro-associated                       |
| 2.920064021       | NM_011704          | Vnn1            | vanin 1                                                        |
| 3.759589119       | NM_021897          | Trp53inp1       | transformation related protein 53 inducible nuclear protein 1  |
| 3.494143841       | NM_139198          | Plac8           | placenta-specific 8                                            |
| <b>3.8889711</b>  | <b>NM_008827</b>   | <b>Pgf</b>      | <b>placental growth factor - survival factor</b>               |
| <b>3.1412995</b>  | <b>NM_029803</b>   | <b>Ifi2712a</b> | <b>interferon, alpha-inducible protein 27 like 2A</b>          |
| 3.306837151       | NM_144543          | Thyn1           | thymocyte nuclear protein 1                                    |
| 3.726275905       | NM_001081298       | Lphn2           | latrophilin 2                                                  |
| 4.725611408       | BC085269           | Rps13           | ribosomal protein S13                                          |
| 2.780173656       | NM_021392          | Ap4m1           | adaptor-related protein complex AP-4, mu 1                     |
| <b>3.8557366</b>  | <b>NM_175649</b>   | <b>Tnfrsf26</b> | <b>tumor necrosis factor receptor superfamily, member 26</b>   |
| 4.630750409       | BC103775           | Fam136a         | family with sequence similarity 136, member A                  |
| 3.518196346       | NM_008326          | Irgm1           | immunity-related GTPase family M member 1                      |
| 5.419202284       | NR_003508          | Mx2             | myxovirus (influenza virus) resistance 2                       |
| <b>-4.9859105</b> | <b>NM_009114</b>   | <b>S100a9</b>   | <b>S100 calcium binding protein A9 (calgranulin B)</b>         |
| <b>2.6017232</b>  | <b>NM_00108140</b> | <b>Adamts3</b>  | <b>a disintegrin-like and metallopeptidase</b>                 |
| 2.855712019       | NM_172603          | Phf11           | PHD finger protein 11                                          |
| 3.388567476       | NM_053158          | Mrpl1           | mitochondrial ribosomal protein L1                             |
| 2.708964523       | NM_134092          | Mtbp            | transformed 3T3 cell double minute p53 binding protein         |
| 4.397696371       | NM_011909          | Usp18           | ubiquitin specific peptidase 18                                |
| 4.113059665       | NM_146265          | Olf1506         | olfactory receptor 1506                                        |
| 4.113059665       | NM_146265          | Olf1506         | olfactory receptor 1506                                        |
| 2.838393282       | NM_016781          | Prkag1          | protein kinase, AMP-activated, gamma 1 non-catalytic subunit   |
| 2.983207853       | NM_001081024       | Setdb2          | SET domain, bifurcated 2                                       |

**Supplemental Table 2. Fold Change in Gene Expression  
Belomycin treated vs. Vehicle Control**

|                   |                     |                |                                                                         |
|-------------------|---------------------|----------------|-------------------------------------------------------------------------|
| 3.182809919       | NM_016923           | Ly96           | lymphocyte antigen 96                                                   |
| 3.639746567       | NM_010501           | Ifit3          | interferon-induced protein with tetratricopeptide repeats 3             |
| <b>3.0278495</b>  | <b>NM_010786</b>    | <b>Mdm2</b>    | <b>transformed mouse 3T3 cell double minute 2</b>                       |
| 3.417802423       | NM_183405           | Cox6b2         | cytochrome c oxidase subunit VIb polypeptide 2                          |
| 3.438350218       | NM_009099           | Trim30         | tripartite motif-containing 30                                          |
| -2.45473196       | NM_019661           | Ykt6           | YKT6 homolog (S. Cerevisiae)                                            |
| 4.584764085       | NM_145825           | Cetn4          | centrin 4                                                               |
| 2.799155239       | NR_004410           | Snord87        | small nucleolar RNA, C/D box 87                                         |
| 2.354374791       | NM_133227           | Nup155         | nucleoporin 155                                                         |
| 4.7528949         | NM_026493           | Cspp1          | centrosome and spindle pole associated protein 1                        |
| 2.616187606       | NM_010145           | Ephx1          | epoxide hydrolase 1, microsomal                                         |
| 2.34445242        | NM_178760           | Gpr107         | G protein-coupled receptor 107                                          |
| 2.37084361        | NM_030724           | Uck2           | uridine-cytidine kinase 2                                               |
| 2.495930911       | NM_018859           | Akr1e1         | aldo-keto reductase family 1, member E1                                 |
| 3.895278554       | AF357394            | Snora44        | small nucleolar RNA, H/ACA box 44                                       |
| -2.41467077       | NM_030691           | Igsf6          | immunoglobulin superfamily, member 6                                    |
| 2.688778665       | NM_026004           | Nt5c3          | 5'-nucleotidase, cytosolic III                                          |
| <b>-8.6317106</b> | <b>NM_054038</b>    | <b>Scgb3a2</b> | <b>secretoglobin, family 3A</b>                                         |
| <b>2.3889837</b>  | <b>NM_010510</b>    | <b>Ifnb1</b>   | <b>interferon beta 1, fibroblast</b>                                    |
| 2.831333121       | ENSMUST000000000000 | Herc5          | hect domain and RLD 5                                                   |
| 2.392909774       | NM_019817           | Copz1          | coatamer protein complex, subunit zeta 1                                |
| 2.672045362       | NM_008332           | Ifit2          | interferon-induced protein with tetratricopeptide repeats 2             |
| 3.295729873       | NM_028451           | Larp1          | La ribonucleoprotein domain family, member 1                            |
| 2.669711784       | NM_133744           | Ccdc71         | coiled-coil domain containing 71                                        |
| 2.161568416       | NM_019921           | Akap10         | A kinase (PRKA) anchor protein 10                                       |
| 2.480018702       | NM_029868           | Gbbp1l1        | GC-rich promoter binding protein 1-like 1                               |
| -2.60989814       | NM_026389           | Poldip2        | polymerase (DNA-directed), delta interacting protein 2                  |
| 5.65481764        | NM_008331           | Ifit1          | interferon-induced protein with tetratricopeptide repeats 1             |
| 2.908638495       | ENSMUST000000000000 | Tcrp-V3        | T-cell receptor gamma, variable 3                                       |
| <b>3.1931338</b>  | <b>Z31359</b>       | <b>Npn2</b>    | <b>neoplastic progression 2</b>                                         |
| 3.060461034       | NM_027835           | Ifih1          | interferon induced with helicase C domain 1                             |
| 2.27169004        | NM_008765           | Orc2l          | origin recognition complex, subunit 2-like (S. cerevisiae)              |
| -3.08829806       | NM_029210           | Sv2c           | synaptic vesicle glycoprotein 2c                                        |
| -4.58468782       | NM_001099298        | Scn2a1         | sodium channel, voltage-gated, type II, alpha 1                         |
| 2.853259571       | NM_028049           | Fbxo22         | F-box protein 22                                                        |
| 2.163892006       | NM_001162855        | Nsmce4a        | non-SMC element 4 homolog A (S. cerevisiae)                             |
| 2.564292794       | NM_001081215        | Ddx60          | DEAD (Asp-Glu-Ala-Asp) box polypeptide 60                               |
| -2.52452069       | NM_153581           | Gpm6a          | glycoprotein m6a                                                        |
| 2.157031134       | NM_007898           | Ebp            | phenylalkylamine Ca <sup>2+</sup> antagonist (emopamil) binding protein |
| 2.113917392       | NM_177601           | Tmem60         | transmembrane protein 60                                                |
| 2.421601544       | NM_145950           | Osgin2         | oxidative stress induced growth inhibitor family member 2               |
| -2.45973177       | NM_011237           | Rad9           | RAD9 homolog (S. pombe)                                                 |
| 2.827661647       | NM_172662           | Gtdc1          | glycosyltransferase-like domain containing 1                            |
| 2.858476639       | NM_181545           | Slfn8          | schlafen 8                                                              |
| 2.341708504       | NM_008867           | Pla2r1         | phospholipase A2 receptor 1                                             |
| 3.155591595       | NM_181588           | Cmb1           | carboxymethylenebutenolidase-like (Pseudomonas)                         |
| 2.780769185       | NM_029573           | Idh3a          | isocitrate dehydrogenase 3 (NAD <sup>+</sup> ) alpha                    |
| 2.55989121        | NM_029005           | Mlkl           | mixed lineage kinase domain-like                                        |
| -2.46344711       | NM_153801           | Tecr1          | trans-2,3-enoyl-CoA reductase-like                                      |
| 2.411449336       | NM_025517           | Rtcd1          | RNA terminal phosphate cyclase domain 1                                 |
| -2.28147841       | NM_008287           | Hrsp12         | heat-responsive protein 12                                              |
| -3.55840816       | NM_001001452        | Tas2r143       | taste receptor, type 2, member 143                                      |
| 2.074522062       | NM_025853           | Dsn1           | MIND kinetochore complex component, homolog                             |
| 2.707025542       | NM_007485           | Rhod           | ras homolog gene family, member D                                       |
| 2.952800731       | NM_001033430        | Jhdm1d         | jumonji C domain-containing histone demethylase 1 homolog D             |

**Supplemental Table 2. Fold Change in Gene Expression  
Belomycin treated vs. Vehicle Control**

|                  |                    |              |                                                              |
|------------------|--------------------|--------------|--------------------------------------------------------------|
| -2.27075727      | NM_013670          | Snrpn        | small nuclear ribonucleoprotein N                            |
| 2.450024201      | NM_026637          | Ggct         | gamma-glutamyl cyclotransferase                              |
| 1.938806736      | AK173199           | Rnf213       | ring finger protein 213                                      |
| 2.301051065      | NM_026493          | Cspp1        | centrosome and spindle pole associated protein 1             |
| 2.031445978      | NM_025691          | Srp72        | signal recognition particle 72                               |
| 2.70878333       | NM_008859          | Prkcq        | protein kinase C, theta                                      |
| -4.12460224      | NM_001159492       | Gpatch8      | G patch domain containing 8                                  |
| 2.207646992      | NM_009250          | Serpini1     | serine (or cysteine) peptidase inhibitor, clade I, member 1  |
| 2.44240932       | NM_145211          | Oas1a        | 2'-5' oligoadenylate synthetase 1A                           |
| 2.118551207      | NM_015786          | Hist1h1c     | histone cluster 1, H1c                                       |
| 2.211746439      | NM_178337          | Tbce         | tubulin-specific chaperone E                                 |
| 2.866067326      | NM_001004140       | Ckap2        | cytoskeleton associated protein 2                            |
| 2.458614424      | NM_146235          | Erc61        | excision repair cross-complementing rodent repair deficiency |
| 2.264170339      | NM_009890          | Ch25h        | cholesterol 25-hydroxylase                                   |
| 2.372622374      | NM_026521          | Zfp706       | zinc finger protein 706                                      |
| -2.24611532      | NM_001081977       | Rnf144a      | ring finger protein 144A                                     |
| 2.137663101      | NM_183145          | Zfp748       | zinc finger protein 748                                      |
| <b>2.4174834</b> | <b>NM_177290</b>   | <b>Itgb8</b> | <b>integrin beta 8</b>                                       |
| 1.921875659      | NM_009103          | Rrm1         | ribonucleotide reductase M1                                  |
| 2.266018281      | NM_175523          | Ppm1k        | protein phosphatase 1K (PP2C domain containing)              |
| 6.978255882      | NM_011315          | Saa3         | serum amyloid A 3                                            |
| 2.387502924      | NM_010360          | Gstm5        | glutathione S-transferase, mu 5                              |
| 2.101364599      | NM_001039530       | Parp14       | poly (ADP-ribose) polymerase family, member 14               |
| 2.105764354      | NM_027698          | Eri2         | exoribonuclease 2                                            |
| 2.827659687      | NM_011163          | Eif2ak2      | eukaryotic translation initiation factor 2-alpha kinase 2    |
| <b>2.0943717</b> | <b>NM_00104438</b> | <b>Timp1</b> | <b>tissue inhibitor of metalloproteinase 1</b>               |
| 2.431453498      | NM_030563          | N4bp1        | NEDD4 binding protein 1                                      |
| 2.253165052      | NM_011075          | Abcb1b       | ATP-binding cassette, sub-family B (MDR/TAP), member 1B      |
| <b>2.3483403</b> | <b>NM_013654</b>   | <b>Ccl7</b>  | <b>chemokine (C-C motif) ligand 7</b>                        |
| 1.892276617      | NM_027193          | Dph5         | DPH5 homolog (S. cerevisiae)                                 |
| 1.89758104       | NM_030066          | Armcx1       | armadillo repeat containing, X-linked 1                      |
| 2.975880305      | NM_011882          | Rnasel       | ribonuclease L (2', 5'-oligoadenylate synthetase-dependent)  |
| 1.862498805      | NM_026665          | Cep57        | centrosomal protein 57                                       |
| 2.381745066      | NM_008012          | Akr1b8       | aldo-keto reductase family 1, member B8                      |
| -2.80470493      | NM_028770          | Krt80        | keratin 80                                                   |
| 2.561503743      | NM_172470          | Wdr35        | WD repeat domain 35                                          |
| 2.763662608      | NM_001015099       | G2e3         | G2/M-phase specific E3 ubiquitin ligase                      |
| 2.050692249      | NM_001005247       | Hps5         | Hermansky-Pudlak syndrome 5 homolog (human)                  |
| 1.966833728      | NM_172685          | Slc25a24     | solute carrier family 25                                     |
| -2.14814369      | NM_001081426       | Dip2c        | DIP2 disco-interacting protein 2 homolog C (Drosophila)      |
| 2.320152284      | NM_080557          | Snx4         | sorting nexin 4                                              |
| 1.998410552      | NM_207000          | H2afy2       | H2A histone family, member Y2                                |
| 1.898958004      | NM_175628          | A2m          | alpha-2-macroglobulin                                        |
| 3.086148535      | NM_026662          | Prps2        | phosphoribosyl pyrophosphate synthetase 2                    |
| -2.1738253       | NM_001042489       | Hvcn1        | hydrogen voltage-gated channel 1                             |
| 2.464552989      | NM_021498          | Pole3        | polymerase (DNA directed), epsilon 3 (p17 subunit)           |
| <b>2.2761064</b> | <b>NM_009810</b>   | <b>Casp3</b> | <b>caspase 3</b>                                             |
| 2.980056121      | NM_144515          | Zfp52        | zinc finger protein 52                                       |
| 2.36473169       | NM_028031          | Zdhhc13      | zinc finger, DHHC domain containing 13                       |
| 2.280074556      | NM_001039521       | Rrn3         | RRN3 RNA polymerase I transcription factor homolog (yeast)   |
| 1.813732256      | NM_178653          | Sccpdh       | saccharopine dehydrogenase (putative)                        |
| 1.923532893      | NM_001081013       | Rlf          | rearranged L-myc fusion sequence                             |
| 1.965180052      | NM_010651          | Klra9        | killer cell lectin-like receptor subfamily A, member 9       |
| 2.074678804      | NM_028394          | Hspb11       | heat shock protein family B (small), member 11               |
| 2.995784815      | NM_029019          | Stard6       | STAR-related lipid transfer (START) domain containing 6      |

**Supplemental Table 2. Fold Change in Gene Expression  
Belomycin treated vs. Vehicle Control**

|                  |                    |                 |                                                              |
|------------------|--------------------|-----------------|--------------------------------------------------------------|
| 2.127306632      | NM_026963          | Lzic            | leucine zipper and CTNNBIP1 domain containing                |
| 2.087362982      | NM_146074          | Tfb1m           | transcription factor B1, mitochondrial                       |
| 1.886689484      | NM_010787          | Mea1            | male enhanced antigen 1                                      |
| <b>2.1735918</b> | <b>NM_024290</b>   | <b>Tnfrsf23</b> | <b>tumor necrosis factor receptor superfamily, member 23</b> |
| 2.664757962      | NM_029019          | Stard6          | STAR-related lipid transfer (START) domain containing 6      |
| 1.803325092      | NM_025649          | Mad2l1bp        | MAD2L1 binding protein                                       |
| 1.891128636      | NM_016903          | Esd             | esterase D/formylglutathione hydrolase                       |
| 1.968057675      | NM_146484          | Olfr197         | olfactory receptor 197                                       |
| 1.765336244      | NM_025338          | Aurkaip1        | aurora kinase A interacting protein 1                        |
| 2.859513071      | NM_138756          | Slc25a36        | solute carrier family 25, member 36                          |
| 1.839469812      | NM_008214          | Hars            | histidyl-tRNA synthetase                                     |
| -2.17196447      | NM_025499          | Eid3            | EP300 interacting inhibitor of differentiation 3             |
| 1.970128867      | NM_021557          | Rdh11           | retinol dehydrogenase 11                                     |
| 2.48168413       | AK049819           | Gabarapl2       | (GABA) A receptor-associated protein-like 2                  |
| 1.854924543      | NM_018851          | Samhd1          | SAM domain and HD domain, 1                                  |
| 1.941513851      | NM_030150          | Dhx58           | DEXH (Asp-Glu-X-His) box polypeptide 58                      |
| 2.132489296      | NM_001024508       | Brd9            | bromodomain containing 9                                     |
| 1.949567357      | NM_016856          | Cpsf2           | cleavage and polyadenylation specific factor 2               |
| 1.747247521      | NM_001013806       | Ankrd13c        | ankyrin repeat domain 13c                                    |
| -1.9883483       | AJ132685           | Snord96a        | small nucleolar RNA, C/D box 96A                             |
| -1.95915358      | NM_178256          | Reps2           | RALBP1 associated Eps domain containing protein 2            |
| 2.499406399      | NM_146141          | Ppa2            | pyrophosphatase (inorganic) 2                                |
| 2.520125359      | NM_019571          | Tspan5          | tetraspanin 5                                                |
| 1.700048023      | <b>NM_00108140</b> | <b>Adamts3</b>  | <b>a disintegrin-like and metallopeptidase</b>               |
| -1.78577213      | NM_033648          | Fxyd4           | FXD domain-containing ion transport regulator 4              |
| 2.515522336      | NM_021367          | Tslp            | thymic stromal lymphopietin                                  |
| -2.00819728      | ENSMUST000000      | Stard9          | START domain containing 9                                    |
| 2.035242214      | NM_030684          | Trim34          | tripartite motif-containing 34                               |
| -2.20085409      | NM_001085376       | Pappa2          | pappalysin 2                                                 |
| -4.22150669      | NM_007817          | Cyp2f2          | cytochrome P450, family 2, subfamily f, polypeptide 2        |
| <b>1.8118267</b> | <b>NM_021274</b>   | <b>Cxcl10</b>   | <b>chemokine (C-X-C motif) ligand 10</b>                     |
| 1.907683716      | BC057057           | Crkrs           | CDC2-related kinase, arginine/serine-rich                    |
| 1.924952038      | NM_012002          | Cops6           | COP9 (constitutive photomorphogenic) homolog, subunit 6      |
| 2.025452848      | NM_134136          | Fbxo38          | F-box protein 38                                             |
| 2.544265981      | NM_001033132       | Comm6           | COMM domain containing 6                                     |
| 2.874387367      | NM_007530          | Bcap29          | B-cell receptor-associated protein 29                        |
| 1.750347049      | NM_011949          | Mapk1           | mitogen-activated protein kinase 1                           |
| 1.740251719      | NM_013895          | Timm13          | translocase of inner mitochondrial membrane 13 homolog       |
| 1.978117329      | NM_016903          | Esd             | esterase D/formylglutathione hydrolase                       |
| 2.080808936      | NM_001110239       | Acp1            | acid phosphatase 1, soluble                                  |
| 2.457851921      | NM_146097          | Cbwd1           | COBW domain containing 1                                     |
| 2.427659356      | NM_175187          | Tmem161b        | transmembrane protein 161B                                   |
| 2.133678782      | NM_009462          | Usp10           | ubiquitin specific peptidase 10                              |
| 2.194943038      | NM_028262          | Setd3           | SET domain containing 3                                      |
| 2.055104136      | NM_198961          | Vmn2r43         | vomer nasal 2, receptor 43                                   |
| 2.208744435      | NM_025377          | Fam33a          | family with sequence similarity 33, member A                 |
| 2.197585048      | NM_025417          | Comm4           | COMM domain containing 4                                     |
| -2.2482555       | NM_001161765       | Fmo5            | flavin containing monooxygenase 5                            |
| -1.86467862      | NM_013526          | Gdf6            | growth differentiation factor 6                              |
| 1.780931467      | NM_172255          | Brwd2           | bromodomain and WD repeat domain containing 2                |
| -1.75261486      | NM_001114660       | Scfd2           | Sec1 family domain containing 2                              |
| <b>3.8344921</b> | <b>NM_009969</b>   | <b>Csf2</b>     | <b>colony stimulating factor 2 (granulocyte-macrophage)</b>  |
| 2.281801036      | NM_024436          | Rab22a          | RAB22A, member RAS oncogene family                           |
| -2.09125502      | NM_001039532       | Zfp784          | zinc finger protein 784                                      |
| 1.762515567      | NM_030736          | V1rd14          | vomer nasal 1 receptor, D14                                  |

**Supplemental Table 2. Fold Change in Gene Expression  
Belomycin treated vs. Vehicle Control**

|                  |                  |              |                                                             |
|------------------|------------------|--------------|-------------------------------------------------------------|
| 2.107736473      | NM_025283        | Mobk13       | MOB1, Mps One Binder kinase activator-like 3 (yeast)        |
| 1.839399687      | NM_008014        | Ppm1g        | protein phosphatase 1G (formerly 2C), magnesium-dependent   |
| 1.946729589      | NM_175285        | Tmem62       | transmembrane protein 62                                    |
| 1.841600334      | NM_010322        | Gnpat        | glyceronephosphate O-acyltransferase                        |
| <b>2.0745573</b> | <b>NM_007527</b> | <b>Bax</b>   | <b>BCL2-associated X protein</b>                            |
| 1.962807923      | NM_001042499     | Rabl3        | RAB, member of RAS oncogene family-like 3                   |
| 1.764949617      | NM_019734        | Asah1        | N-acylsphingosine amidohydrolase 1                          |
| 2.209752053      | NM_025390        | Pop4         | processing of precursor 4, ribonuclease P/MRP family        |
| 1.963505991      | NM_175489        | Osbpl8       | oxysterol binding protein-like 8                            |
| <b>2.4736793</b> | <b>NM_007950</b> | <b>Ereg</b>  | <b>epiregulin</b>                                           |
| 2.260120198      | NM_011399        | Slc25a17     | solute carrier family 25, member 17                         |
| 1.778977791      | NM_181411        | Aftph        | aftiphilin                                                  |
| 1.796143355      | NM_146165        | Aimp2        | aminoacyl tRNA synthetase complex-interacting protein 2     |
| <b>1.6566295</b> | <b>NM_013929</b> | <b>Siva1</b> | <b>SIVA1, apoptosis-inducing factor</b>                     |
| 1.999550891      | NM_007563        | Bpgm         | 2,3-bisphosphoglycerate mutase                              |
| 2.171045558      | NM_025578        | Mrps25       | mitochondrial ribosomal protein S25                         |
| 1.964878357      | NM_020584        | Terf2ip      | telomeric repeat binding factor 2, interacting protein      |
| 1.889710194      | NM_026075        | Sfrs12ip1    | SFRS12-interacting protein 1                                |
| 2.040735208      | NR_027492        | Hspa13       | heat shock protein 70 family, member 13                     |
| -1.97599185      | NM_027884        | Tns1         | tensin 1                                                    |
| 2.043401923      | NM_026422        | Mrrf         | mitochondrial ribosome recycling factor                     |
| 2.143930294      | NM_027013        | Scnm1        | sodium channel modifier 1                                   |
| 2.227770319      | NM_030686        | Dhrs4        | dehydrogenase/reductase (SDR family) member 4               |
| 2.020290143      | NM_023585        | Ube2v2       | ubiquitin-conjugating enzyme E2 variant 2                   |
| 2.000745272      | NM_172796        | Slfn9        | schlafen 9                                                  |
| 2.494671754      | XR_034252        | H2-t9        | MHC class Ib T9                                             |
| 2.025464782      | NM_023585        | Ube2v2       | ubiquitin-conjugating enzyme E2 variant 2                   |
| 2.076106568      | NM_024251        | Ap1f         | aprataxin and PNKP like factor                              |
| 1.686308508      | NM_146142        | Tdrd7        | tudor domain containing 7                                   |
| 2.217030319      | NM_028387        | Macro2       | MACRO domain containing 2                                   |
| 3.697954567      | AF357396         | Snora34      | small nucleolar RNA, H/ACA box 34                           |
| -1.97626169      | NM_009127        | Scd1         | stearoyl-Coenzyme A desaturase 1                            |
| 2.906266496      | NM_172612        | Rnd1         | Rho family GTPase 1                                         |
| 1.906973109      | NM_030131        | Cnih4        | cornichon homolog 4 (Drosophila)                            |
| 2.010786628      | NM_145428        | Dhrs7b       | dehydrogenase/reductase (SDR family) member 7B              |
| 1.883041767      | NM_030253        | Parp9        | poly (ADP-ribose) polymerase family, member 9               |
| 1.680694489      | NM_153198        | Hbp1         | high mobility group box transcription factor 1              |
| 1.738433643      | NM_021556        | Mrps30       | mitochondrial ribosomal protein S30                         |
| -2.4732533       | NM_008522        | Ltf          | lactotransferrin                                            |
| 1.749472516      | NM_008466        | Kpna3        | karyopherin (importin) alpha 3                              |
| -2.31107647      | NM_001085376     | Pappa2       | pappalysin 2                                                |
| 2.456150561      | NM_001013802     | Macro2       | MACRO domain containing 2                                   |
| 2.030899713      | NM_026479        | Zcchc10      | zinc finger, CCHC domain containing 10                      |
| 1.648409862      | BC060679         | Fam178a      | family with sequence similarity 178, member A               |
| -2.21329384      | NM_008860        | Prkcz        | protein kinase C, zeta                                      |
| 2.286424055      | NM_030730        | Rad54l2      | RAD54 like 2 (S. cerevisiae)                                |
| 2.289491169      | NM_010266        | Gda          | guanine deaminase                                           |
| 1.791956977      | NM_181039        | Lphn1        | latrophilin 1                                               |
| 1.972340997      | NM_025372        | Tipin        | timeless interacting protein                                |
| 1.758257657      | NM_011955        | Nubp1        | nucleotide binding protein 1                                |
| 2.187483296      | NM_133748        | Insig2       | insulin induced gene 2                                      |
| 1.759331687      | NM_001005509     | Eif2a        | eukaryotic translation initiation factor 2a                 |
| -1.79888443      | NM_028127        | Frmd6        | FERM domain containing 6                                    |
| 2.333932763      | NM_178907        | Mapkapk3     | mitogen-activated protein kinase-activated protein kinase 3 |
| 2.277906451      | NM_024413        | Plekhf1      | pleckstrin homology domain containing, family F             |

**Supplemental Table 2. Fold Change in Gene Expression  
Belomycin treated vs. Vehicle Control**

|                  |                  |              |                                                               |
|------------------|------------------|--------------|---------------------------------------------------------------|
| 1.987449909      | NM_024214        | Tom20        | translocase of outer mitochondrial membrane 20 homolog        |
| <b>2.0229217</b> | <b>NM_022032</b> | <b>Perp</b>  | <b>PERP, TP53 apoptosis effector</b>                          |
| -2.08625933      | NM_134154        | Slc25a45     | solute carrier family 25, member 45                           |
| 2.75835855       | NM_009264        | Sprr1a       | small proline-rich protein 1A                                 |
| 1.673882198      | NM_027423        | Polr3b       | polymerase (RNA) III (DNA directed) polypeptide B             |
| 1.65287314       | NM_001045481     | Ifi203       | interferon activated gene 203                                 |
| 2.110000002      | NM_172054        | Txnrc9       | thioredoxin domain containing 9                               |
| 1.881324874      | NM_175552        | Wdr3         | WD repeat domain 3                                            |
| <b>1.7610196</b> | <b>NM_010754</b> | <b>Smad2</b> | <b>MAD homolog 2 (Drosophila)</b>                             |
| 1.897119425      | NM_023605        | Fbxo9        | f-box protein 9                                               |
| 1.689554045      | NM_026545        | Psmd8        | proteasome (prosome, macropain) 26S subunit, non-ATPase, 8    |
| 1.853556382      | NM_009517        | Zmat3        | zinc finger matrix type 3                                     |
| 2.497930782      | NM_194336        | Mpa2l        | macrophage activation 2 like                                  |
| 1.941828111      | NM_025683        | Rpe          | ribulose-5-phosphate-3-epimerase                              |
| <b>-1.572306</b> | <b>NM_010091</b> | <b>Dvl1</b>  | <b>dishevelled, dsh homolog 1 (Drosophila)</b>                |
| 1.935710228      | NM_001113533     | Wtap         | Wilms' tumour 1-associating protein                           |
| -1.64106172      | NM_019588        | Plce1        | phospholipase C, epsilon 1                                    |
| -1.65202612      | NM_172261        | Ppp1r9b      | protein phosphatase 1, regulatory subunit 9B                  |
| -1.60968233      | NM_008157        | Gpr19        | G protein-coupled receptor 19                                 |
| 1.587871318      | NM_026453        | Mak16        | MAK16 homolog (S. cerevisiae)                                 |
| 1.596503261      | NM_027238        | Ttc39b       | tetratricopeptide repeat domain 39B                           |
| -2.11020111      | NM_011929        | Clcn6        | chloride channel 6                                            |
| 1.818906646      | NM_024441        | Hspb2        | heat shock protein 2                                          |
| -1.83547186      | NM_172134        | Pdxk         | pyridoxal (pyridoxine, vitamin B6) kinase                     |
| 2.742568206      | NM_177030        | Dock6        | dedicator of cytokinesis 6                                    |
| 2.250381348      | NM_145825        | Cetn4        | centrin 4                                                     |
| 1.643878873      | NM_023128        | Palm         | paralemmin                                                    |
| -2.47833034      | NM_021466        | Taf1a        | TATA box binding protein (Tbp)-associated factor              |
| <b>1.8454728</b> | <b>NM_183417</b> | <b>Cdk2</b>  | <b>cyclin-dependent kinase 2</b>                              |
| -1.87390719      | NM_007960        | Etv1         | ets variant gene 1                                            |
| -1.72759195      | NM_027884        | Tns1         | tensin 1                                                      |
| -1.97643362      | NM_013811        | Dnahc8       | dynein, axonemal, heavy chain 8                               |
| 1.813301721      | NM_199035        | Alg8         | asparagine-linked glycosylation 8 homolog                     |
| 2.074652201      | NM_145545        | Gbp6         | guanylate binding protein 6                                   |
| 1.644924081      | NM_013522        | Frg1         | FSHD region gene 1                                            |
| -1.65506743      | NM_029568        | Mfap4        | microfibrillar-associated protein 4                           |
| -1.60427003      | NM_026385        | Plip         | plasma membrane proteolipid                                   |
| -1.77150188      | NM_001037707     | Zfp27        | zinc finger protein 27                                        |
| 1.552706876      | NM_025899        | Uqcrc2       | ubiquinol cytochrome c reductase core protein 2               |
| 2.891959804      | NM_203507        | Rwdd4a       | RWD domain containing 4A                                      |
| -1.6660694       | NM_172263        | Pde8b        | phosphodiesterase 8B                                          |
| 2.501804402      | NM_013651        | Sf3a2        | splicing factor 3a, subunit 2                                 |
| 1.67191152       | NM_026406        | Rnf115       | ring finger protein 115                                       |
| 1.848031695      | NM_019417        | Pdlim4       | PDZ and LIM domain 4                                          |
| -1.92345956      | NM_013860        | Limd1        | LIM domains containing 1                                      |
| 1.908010354      | NM_026836        | Taf11        | TAF11 RNA polymerase II, TATA box binding protein             |
| 1.901766339      | NM_027091        | Nup35        | nucleoporin 35                                                |
| -2.0408413       | NM_019910        | Dcpp1        | demilune cell and parotid protein 1                           |
| 3.111660149      | NM_025901        | Polr3k       | polymerase (RNA) III (DNA directed) polypeptide K             |
| 1.647305347      | NM_025478        | Isoc1        | isochorismatase domain containing 1                           |
| 2.004576534      | NM_025332        | Gtpbp8       | GTP-binding protein 8 (putative)                              |
| 1.811386612      | NM_027226        | Fyttd1       | forty-two-three domain containing 1                           |
| 1.817397501      | NM_007638        | Cct7         | chaperonin containing Tcp1, subunit 7 (eta)                   |
| 1.845591801      | NM_029508        | Pcgf5        | polycomb group ring finger 5                                  |
| 2.39872455       | NM_031159        | Apobec1      | apolipoprotein B mRNA editing enzyme, catalytic polypeptide 1 |

**Supplemental Table 2. Fold Change in Gene Expression  
Belomycin treated vs. Vehicle Control**

|                  |                     |                  |                                                              |
|------------------|---------------------|------------------|--------------------------------------------------------------|
| <b>1.6966394</b> | <b>NM_023190</b>    | <b>Acin1</b>     | <b>apoptotic chromatin condensation inducer 1</b>            |
| 2.124615832      | NM_008186           | Gtf2h1           | general transcription factor II H, polypeptide 1             |
| 1.960476026      | NM_023835           | Trim12           | tripartite motif-containing 12                               |
| 1.728546004      | NM_028990           | Tmem168          | transmembrane protein 168                                    |
| -1.71609688      | NM_015820           | Hs6st3           | heparan sulfate 6-O-sulfotransferase 3                       |
| 2.037075568      | NM_024214           | Tomm20           | translocase of outer mitochondrial membrane 20 homolog       |
| 1.899825615      | NM_001013371        | Dtx3l            | deltex 3-like (Drosophila)                                   |
| 1.590734981      | NM_019505           | Dgke             | diacylglycerol kinase, epsilon                               |
| -2.20851556      | NM_001024720        | Hmcn1            | hemicentin 1                                                 |
| -1.72923926      | NM_172467           | Zc3hav1l         | zinc finger CCCH-type, antiviral 1-like                      |
| 1.744224207      | NM_030143           | Ddit4l           | DNA-damage-inducible transcript 4-like                       |
| -2.16739484      | NM_008557           | Fxyd3            | FXYP domain-containing ion transport regulator 3             |
| -1.61977621      | NM_009824           | Cbfa2t3          | core-binding factor, runt domain, alpha subunit 2            |
| -1.54613522      | NM_019864           | Atr              | ataxia telangiectasia and Rad3 related                       |
| <b>1.8799353</b> | <b>NM_011052</b>    | <b>Pdcd6ip</b>   | <b>programmed cell death 6 interacting protein</b>           |
| 1.523114077      | BC064462            | Cep192           | centrosomal protein 192                                      |
| -1.57358924      | NM_178389           | Gale             | galactose-4-epimerase, UDP                                   |
| 2.256332995      | NM_013594           | Mbd1             | methyl-CpG binding domain protein 1                          |
| 1.821981739      | NM_178690           | Rab3gap1         | RAB3 GTPase activating protein subunit 1                     |
| -2.64487584      | NM_144917           | Elmod3           | ELMO/CED-12 domain containing 3                              |
| <b>2.3465448</b> | <b>NM_018761</b>    | <b>Cttnal1</b>   | <b>catenin (cadherin associated protein), alpha-like 1</b>   |
| 1.892945664      | NM_001035854        | Ap2b1            | adaptor-related protein complex 2, beta 1 subunit            |
| 1.932356793      | NM_001081223        | Rbbp8            | retinoblastoma binding protein 8                             |
| 1.733347604      | NM_030715           | Polh             | polymerase (DNA directed), eta (RAD 30 related)              |
| 1.670633184      | NM_026851           | Mrpl52           | mitochondrial ribosomal protein L52                          |
| -1.98078528      | NM_198617           | Tspyl3           | TSPY-like 3                                                  |
| 1.899485238      | NM_028608           | Glpr1            | GLI pathogenesis-related 1 (glioma)                          |
| <b>1.6662334</b> | <b>NM_001033333</b> | <b>Serpina3f</b> | <b>serine (or cysteine) peptidase inhibitor, clade A,3F</b>  |
| -1.9762932       | NM_024178           | Alg14            | asparagine-linked glycosylation 14 homolog (yeast)           |
| 1.633407775      | BC068129            | Fam83d           | family with sequence similarity 83, member D                 |
| 1.547484544      | NM_009752           | Glb1             | galactosidase, beta 1                                        |
| 1.68146063       | NM_008971           | Twf1             | twinfilin, actin-binding protein, homolog 1 (Drosophila)     |
| 1.668960141      | EF651808            | Hn1l             | hematological and neurological expressed 1-like              |
| 3.058236547      | NM_021365           | Xlr4b            | X-linked lymphocyte-regulated 4B                             |
| -1.529299        | NM_001033525        | Kcnk6            | potassium inwardly-rectifying channel, subfamily K, member 6 |
| 2.143110889      | NM_029338           | Rsph9            | radial spoke head 9 homolog (Chlamydomonas)                  |
| -3.12805635      | NM_001081426        | Dip2c            | DIP2 disco-interacting protein 2 homolog C (Drosophila)      |
| -2.01718653      | NM_133792           | Pla2g15          | phospholipase A2, group XV                                   |
| 1.619282275      | NM_173743           | Apol9b           | apolipoprotein L 9b                                          |
| -1.63887293      | NM_027844           | Krtap5-2         | keratin associated protein 5-2                               |
| 1.572807384      | NM_001024720        | Hmcn1            | hemicentin 1                                                 |
| -1.68378683      | NM_023179           | Atp6v1g2         | ATPase, H+ transporting, lysosomal V1 subunit G2             |
| <b>3.4319333</b> | <b>NM_009141</b>    | <b>Cxcl5</b>     | <b>chemokine (C-X-C motif) ligand 5</b>                      |
| 1.717151107      | NM_007713           | Clk3             | CDC-like kinase 3                                            |
| 1.687387711      | NM_001081401        | Adamts3          | a disintegrin-like and metallopeptidase                      |
| 2.01857893       | NM_018818           | Chm              | choroideremia                                                |
| -1.75982015      | NM_001033393        | Tmem104          | transmembrane protein 104                                    |
| 1.636924748      | NM_001033275        | Glt8d3           | glycosyltransferase 8 domain containing 3                    |
| 1.889667625      | NM_172648           | Ifi205           | interferon activated gene 205                                |
| 1.592706572      | NM_001081264        | Alg6             | asparagine-linked glycosylation 6 homolog                    |
| 1.635352339      | NM_153591           | Nars2            | asparaginyl-tRNA synthetase 2 (mitochondrial)(putative)      |
| 1.507395509      | NM_030736           | V1rd14           | vomer nasal 1 receptor, D14                                  |
| 2.000998381      | NM_013717           | B9d1             | B9 protein domain 1                                          |
| <b>1.6716659</b> | <b>NM_009830</b>    | <b>Ccne2</b>     | <b>cyclin E2</b>                                             |
| 1.839348051      | NM_007697           | Chl1             | cell adhesion molecule with homology to L1CAM                |

**Supplemental Table 2. Fold Change in Gene Expression  
Belomycin treated vs. Vehicle Control**

|                  |                  |               |                                                               |
|------------------|------------------|---------------|---------------------------------------------------------------|
| 2.471809397      | NM_010408        | Hcn1          | hyperpolarization-activated, cyclic nucleotide-gated K+ 1     |
| 1.73912424       | NM_011816        | G3bp2         | GTPase activating protein (SH3 domain) binding protein 2      |
| 1.579446971      | NM_023258        | Pycard        | PYD and CARD domain containing                                |
| 1.969051029      | NM_021312        | Wdr12         | WD repeat domain 12                                           |
| 1.527620833      | NM_023697        | Rdh14         | retinol dehydrogenase 14 (all-trans and 9-cis)                |
| 2.346388654      | NM_133358        | Zfp617        | zinc finger protein 617                                       |
| 1.49401538       | NM_011592        | Timm44        | translocase of inner mitochondrial membrane 44                |
| 1.83795953       | NM_001025246     | Trp53i11      | transformation related protein 53 inducible protein 11        |
| 1.607081952      | NM_008249        | Tfb2m         | transcription factor B2, mitochondrial                        |
| 2.254190591      | NM_011568        | Thoc4         | THO complex 4                                                 |
| 1.614941046      | NM_026553        | Yif1a         | Yip1 interacting factor homolog A (S. cerevisiae)             |
| 1.934718942      | NM_175012        | Grp           | gastrin releasing peptide                                     |
| 1.764522101      | NM_019787        | Sec23b        | SEC23B (S. cerevisiae)                                        |
| 1.852314409      | NM_130877        | Peg10         | paternally expressed 10                                       |
| 1.845457483      | NM_152808        | Slc44a2       | solute carrier family 44, member 2                            |
| -1.90068506      | NM_021433        | Stx6          | syntaxin 6                                                    |
| 2.254606251      | NM_152825        | Usp45         | ubiquitin specific peptidase 45                               |
| 2.142236113      | NM_026887        | Ap1s2         | adaptor-related protein complex 1, sigma 2 subunit            |
| -1.59301627      | NM_001033155     | Dnajb14       | DnaJ (Hsp40) homolog, subfamily B, member 14                  |
| 1.916906541      | NM_001123327     | Qser1         | glutamine and serine rich 1                                   |
| -1.50690764      | NM_021356        | Gab1          | growth factor receptor bound protein 2-associated protein 1   |
| -1.67660403      | NM_178772        | Nceh1         | arylacetamide deacetylase-like 1                              |
| 1.709366199      | NM_144826        | Utp6          | UTP6, small subunit (SSU) processome component                |
| 2.407398545      | NM_027764        | Rcbtb1        | regulator of chromosome condensation (RCC1)                   |
| 2.413730326      | NM_001113460     | Tec           | tec protein tyrosine kinase                                   |
| 1.653403677      | NM_008444        | Kif3b         | kinesin family member 3B                                      |
| 1.675028915      | NM_025349        | Lsm7          | LSM7 homolog, U6 small nuclear RNA associated (S. cerevisiae) |
| 1.478959453      | NM_175127        | Fbxo28        | F-box protein 28                                              |
| 1.891247926      | NM_133688        | Lym5          | LYR motif containing 5                                        |
| 1.915333344      | NM_053159        | Mrpl3         | mitochondrial ribosomal protein L3                            |
| -1.50043207      | NM_023485        | Sync          | syncoilin                                                     |
| <b>1.5087408</b> | <b>NM_007669</b> | <b>Cdkn1a</b> | <b>cyclin-dependent kinase inhibitor 1A (P21)</b>             |
| 1.548309083      | NM_010799        | Minpp1        | multiple inositol polyphosphate histidine phosphatase 1       |
| 1.724627154      | NM_025570        | Mrpl20        | mitochondrial ribosomal protein L20                           |
| 1.698391434      | NM_021312        | Wdr12         | WD repeat domain 12                                           |
| -1.57149317      | NM_001039532     | Zfp784        | zinc finger protein 784                                       |
| 2.712312672      | NM_023422        | Hist1h2bc     | histone cluster 1, H2bc                                       |
| 1.664550338      | NM_013841        | Vps45         | vacuolar protein sorting 45 (yeast)                           |
| -1.60731088      | NM_019472        | Myo10         | myosin X                                                      |
| 1.560684047      | NM_010291        | Gjb5          | gap junction protein, beta 5                                  |
| 3.340079635      | NM_011207        | Ptpn3         | protein tyrosine phosphatase, non-receptor type 3             |
| 1.523619334      | NM_001039169     | Eif4e2        | eukaryotic translation initiation factor 4E member 2          |
| 1.625982804      | NM_024221        | Pdhb          | pyruvate dehydrogenase (lipoamide) beta                       |
| 1.873415621      | NM_176930        | Nrcam         | neuron-glia-CAM-related cell adhesion molecule                |
| -2.00236572      | ENSMUST000001    | Eif4e         | eukaryotic translation initiation factor 4E                   |
| 1.68048306       | NM_010708        | Lgals9        | lectin, galactose binding, soluble 9                          |
| -1.61641652      | NM_145465        | Stk24         | serine/threonine kinase 24 (STE20 homolog, yeast)             |
| 2.528401367      | NM_029578        | Tgds          | TDP-glucose 4,6-dehydratase                                   |
| <b>1.9651712</b> | <b>NM_013929</b> | <b>Siva1</b>  | <b>SIVA1, apoptosis-inducing factor</b>                       |
| -1.68254956      | NM_145506        | Epb4.1l5      | erythrocyte protein band 4.1-like 5                           |
| -1.54238882      | NM_198634        | Tigd3         | tigger transposable element derived 3                         |
| 1.481781267      | NM_026279        | Bend5         | BEN domain containing 5                                       |
| 2.022785021      | NM_019440        | Irgm2         | immunity-related GTPase family M member 2                     |
| 1.669315327      | NM_001159544     | Frk           | fyn-related kinase                                            |
| 1.569891659      | NM_019685        | Ruvbl1        | RuvB-like protein 1                                           |



**Supplemental Table 2. Fold Change in Gene Expression  
Belomycin treated vs. Vehicle Control**

|                  |                    |              |                                                               |
|------------------|--------------------|--------------|---------------------------------------------------------------|
| 1.735712497      | NM_010163          | Ext2         | exostoses (multiple) 2                                        |
| <b>1.8168509</b> | <b>NM_011333</b>   | <b>Ccl2</b>  | <b>chemokine (C-C motif) ligand 2</b>                         |
| 1.938548729      | NM_027453          | Btf3l4       | basic transcription factor 3-like 4                           |
| <b>2.2130369</b> | <b>NM_00102506</b> | <b>Lrig</b>  | <b>leucine-rich repeats and immunoglobulin-like domains 2</b> |
| 2.343121069      | NM_010846          | Mx1          | myxovirus (influenza virus) resistance 1                      |
| <b>1.6726748</b> | <b>NM_021500</b>   | <b>Maea</b>  | <b>macrophage erythroblast attacher</b>                       |
| -1.46909226      | NM_145496          | Dak          | dihydroxyacetone kinase 2 homolog (yeast)                     |
| 1.878142463      | NM_138596          | Med10        | mediator of RNA polymerase II transcription, subunit 10       |
| -1.65422445      | NM_027884          | Tns1         | tensin 1                                                      |
| <b>1.6267009</b> | <b>NM_00100149</b> | <b>Tnip3</b> | <b>TNFAIP3 interacting protein 3</b>                          |
| 1.56316384       | NM_133941          | Dhx32        | DEAH (Asp-Glu-Ala-His) box polypeptide 32                     |
| 1.444877818      | NM_026582          | Gpr177       | G protein-coupled receptor 177                                |
| -1.55235014      | NM_145927          | Fntb         | farnesyltransferase, CAAX box, beta                           |
| -1.49370371      | NM_009338          | Acat2        | acetyl-Coenzyme A acetyltransferase 2                         |

|                                                                                   |                       |
|-----------------------------------------------------------------------------------|-----------------------|
|  | mobilization          |
|  | immune modulation     |
|  | cell cycle            |
|  | apoptosis             |
|  | fibrosis              |
|  | TGF and Wnt signaling |
